# Supplementary material
Source: PubMed Central journal article supplement (PMC1150427)
Supplement: plntphys_pp.104.057950_1.pdf [file plntphys_pp.104.057950_1.pdf]

 = Signal peptide as determined by SignalP

 = Phase 0 splice site

 = Phase 1 splice site

 = Phase 2 splice site

 = CPY propeptide

 = Potential N-glycosylation sites

 = Disulfide-forming cysteine residues in CPY and candidate disulfide-forming cysteine residues in Arabidopsis SCPL proteins

 = Residue found in at least 75% (15/19) of SCPL proteins in clade IA (SCPL proteins 1-19) only

 = Residue found in at least 75% (19/25) of SCPL proteins in clade II (SCPL proteins 22-46) only

 = Residue found in at least 75% (4/5) of SCPL proteins in clades IV-VI (SCPL proteins 47-51) only

 = Residue found in at least 75% of SCPL proteins for any two of the three clades IA, and IV-VI only

 = Residue found in at least 75% of SCPL proteins for each of clades IA and IV-VI

 = Putative catalytic residue





SCPL

| protein | 110 | 111 | 112 | 113 | 114 | 115 | 116 | 117 | 118 | 119 | 120 | 121 | 122 | 123 | 124 | 125 | 126 | 127 | 128 | 129 | 130 | 131 | 132 | 133 | 134 | 135 | 136 | 137 | 138 | 139 | 140 | 141 | 142 | 143 | 144 | 145 | 146 | 147 | 148 | 149 | 150 | 151 | 152 | 153 | 154 | 155 | 156 | 157 | 158 | 159 | 160 | 161 | 162 | 163 | 164 | 165 |   |   |   |   |
|---------|-----|-----|-----|-----|-----|-----|-----|-----|-----|-----|-----|-----|-----|-----|-----|-----|-----|-----|-----|-----|-----|-----|-----|-----|-----|-----|-----|-----|-----|-----|-----|-----|-----|-----|-----|-----|-----|-----|-----|-----|-----|-----|-----|-----|-----|-----|-----|-----|-----|-----|-----|-----|-----|-----|-----|-----|---|---|---|---|
| 01      | A   | S   | I   | V   | K   | S   | L   | P   | G   | F   | E   | G   | Q   | L   | P   | F   | E   | L   | E   | T   | G   | Y   | I   | G   | V   | G   | E   | E   | E   | E   | -   | V   | Q   | L   | F   | Y   | Y   | F   | I   | K   | S   | E   | -   | -   | -   | -   | R   | N   | P   | K   | E   | D   | P   | L   | I   | L   | L |   |   |   |
| 02      | A   | S   | I   | V   | K   | F   | L   | P   | G   | F   | E   | G   | P   | L   | P   | F   | E   | L   | E   | T   | G   | Y   | I   | G   | I   | G   | E   | E   | E   | E   | -   | V   | Q   | L   | F   | Y   | Y   | F   | I   | K   | S   | E   | -   | -   | -   | -   | R   | N   | P   | K   | E   | D   | P   | L   | I   | L   | L |   |   |   |
| 03      | A   | T   | I   | V   | K   | S   | L   | P   | G   | F   | E   | G   | P   | L   | P   | F   | E   | L   | E   | T   | G   | Y   | I   | G   | V   | G   | E   | E   | E   | E   | -   | V   | Q   | L   | F   | Y   | Y   | F   | I   | K   | S   | E   | -   | -   | -   | -   | R   | N   | P   | K   | E   | D   | P   | L   | I   | L   | L |   |   |   |
| 04      | A   | S   | I   | V   | K   | F   | L   | P   | G   | F   | E   | G   | P   | L   | P   | F   | E   | L   | E   | T   | G   | Y   | I   | G   | V   | G   | E   | E   | E   | E   | -   | V   | Q   | L   | F   | Y   | Y   | F   | I   | K   | S   | E   | -   | -   | -   | -   | R   | N   | P   | K   | E   | D   | P   | L   | I   | L   | L |   |   |   |
| 05      | A   | S   | I   | V   | K   | F   | L   | P   | G   | F   | E   | G   | P   | L   | P   | F   | E   | L   | E   | T   | G   | Y   | I   | G   | I   | G   | E   | E   | E   | E   | -   | V   | Q   | L   | F   | Y   | Y   | F   | I   | K   | S   | E   | -   | -   | -   | -   | R   | N   | P   | K   | E   | D   | P   | L   | I   | L   | L |   |   |   |
| 06      | A   | S   | I   | V   | K   | S   | L   | P   | G   | F   | E   | G   | P   | L   | P   | F   | E   | L   | E   | T   | G   | Y   | I   | G   | V   | G   | E   | E   | E   | E   | -   | V   | Q   | L   | F   | Y   | Y   | F   | I   | K   | S   | E   | -   | -   | -   | -   | R   | N   | P   | K   | E   | D   | P   | L   | I   | L   | L |   |   |   |
| 07      | A   | S   | I   | V   | K   | S   | L   | P   | G   | F   | D   | G   | P   | L   | P   | F   | E   | L   | E   | T   | G   | Y   | I   | G   | V   | G   | E   | E   | E   | E   | -   | V   | Q   | L   | F   | Y   | Y   | F   | I   | K   | S   | E   | -   | -   | -   | -   | R   | N   | P   | Q   | E   | D   | P   | L   | I   | L   | L |   |   |   |
| 08=SMT  | A   | S   | I   | V   | K   | F   | L   | P   | G   | F   | E   | G   | P   | L   | P   | F   | E   | L   | E   | T   | G   | Y   | I   | G   | I   | G   | E   | D   | E   | N   | -   | V   | Q   | F   | F   | Y   | Y   | F   | I   | K   | S   | E   | -   | -   | -   | -   | N   | N   | P   | K   | E   | D   | P   | L   | I   | L   | L |   |   |   |
| 09      | G   | S   | I   | V   | K   | F   | L   | P   | G   | F   | K   | G   | P   | L   | P   | F   | E   | L   | E   | T   | G   | Y   | I   | G   | I   | G   | E   | E   | E   | N   | -   | V   | Q   | F   | F   | Y   | Y   | F   | I   | K   | S   | D   | -   | -   | -   | -   | K   | N   | P   | Q   | E   | D   | P   | L   | I   | L   | L |   |   |   |
| 10      | A   | A   | I   | V   | K   | S   | L   | P   | G   | L   | E   | G   | R   | L   | P   | F   | E   | L   | E   | T   | G   | Y   | I   | G   | I   | G   | E   | E   | E   | D   | -   | I   | Q   | L   | F   | Y   | Y   | F   | I   | K   | S   | E   | -   | -   | -   | -   | N   | N   | P   | K   | E   | D   | P   | L   | I   | L   | L |   |   |   |
| 11      | G   | S   | I   | V   | K   | F   | L   | P   | G   | F   | E   | G   | P   | L   | P   | F   | E   | L   | E   | T   | G   | Y   | I   | G   | I   | G   | E   | E   | E   | E   | -   | V   | Q   | L   | F   | Y   | Y   | F   | I   | K   | S   | E   | -   | -   | -   | -   | R   | N   | P   | K   | E   | D   | P   | L   | I   | L   | L |   |   |   |
| 12      | G   | S   | I   | V   | K   | F   | L   | P   | G   | F   | E   | G   | P   | L   | P   | F   | E   | L   | E   | T   | G   | Y   | I   | G   | I   | G   | E   | E   | E   | D   | -   | V   | Q   | L   | F   | Y   | Y   | F   | I   | K   | S   | E   | -   | -   | -   | -   | R   | N   | P   | K   | E   | D   | P   | L   | I   | L   | L |   |   |   |
| 13      | G   | S   | I   | V   | K   | F   | L   | P   | G   | F   | E   | G   | P   | L   | P   | F   | E   | L   | E   | T   | G   | Y   | I   | G   | I   | G   | E   | E   | E   | E   | -   | V   | Q   | L   | F   | Y   | Y   | F   | I   | K   | S   | E   | -   | -   | -   | -   | K   | N   | P   | E   | E   | D   | P   | L   | I   | L   | L |   |   |   |
| 14      | S   | S   | I   | I   | K   | Y   | L   | P   | G   | F   | E   | G   | P   | L   | P   | F   | E   | L   | E   | T   | G   | Y   | I   | G   | V   | G   | D   | E   | D   | E   | -   | D   | Q   | M   | F   | Y   | Y   | F   | I   | K   | S   | E   | -   | -   | -   | -   | S   | N   | P   | E   | E   | D   | P   | L   | I   | L   | L |   |   |   |
| 15      | S   | S   | I   | I   | R   | Y   | L   | P   | G   | F   | E   | G   | P   | L   | P   | F   | E   | L   | E   | T   | G   | Y   | I   | G   | V   | G   | Q   | K   | E   | E   | -   | D   | Q   | L   | F   | Y   | Y   | F   | I   | K   | S   | E   | -   | -   | -   | -   | N   | N   | P   | E   | E   | D   | P   | L   | I   | L   | L |   |   |   |
| 16      | S   | S   | I   | I   | K   | Y   | L   | P   | G   | F   | E   | G   | P   | L   | P   | F   | E   | L   | E   | T   | G   | Y   | I   | G   | V   | G   | E   | E   | D   | E   | -   | D   | Q   | M   | F   | Y   | Y   | F   | I   | K   | S   | E   | -   | -   | -   | -   | S   | N   | P   | K   | T   | D   | P   | L   | I   | L   | L |   |   |   |
| 17      | G   | S   | T   | I   | R   | F   | L   | P   | G   | F   | Q   | G   | L   | L   | P   | F   | E   | L   | E   | T   | G   | Y   | I   | G   | V   | G   | E   | A   | E   | K   | -   | D   | Q   | M   | F   | Y   | Y   | F   | I   | K   | S   | E   | -   | -   | -   | -   | S   | N   | P   | E   | K   | D   | P   | L   | I   | L   | L |   |   |   |
| 18      | A   | S   | V   | I   | S   | Y   | L   | P   | G   | F   | E   | G   | L   | L   | P   | F   | H   | L   | E   | T   | G   | Y   | I   | G   | V   | G   | E   | G   | E   | K   | -   | V   | Q   | L   | F   | Y   | Y   | F   | I   | K   | S   | E   | -   | -   | -   | -   | N   | N   | P   | E   | E   | D   | P   | L   | I   | L   | L |   |   |   |
| 19=SCT  | S   | L   | L   | V   | K   | S   | L   | P   | G   | F   | E   | G   | P   | L   | P   | F   | E   | L   | E   | T   | G   | Y   | V   | S   | I   | G   | E   | S   | G   | D   | -   | V   | E   | L   | F   | Y   | Y   | F   | V   | K   | S   | E   | -   | -   | -   | -   | R   | N   | P   | E   | N   | D   | P   | L   | M   | I   | L | L |   |   |
| 20      | S   | A   | L   | I   | T   | K   | L   | P   | G   | F   | E   | G   | T   | F   | P   | S   | K   | H   | Y   | S   | G   | Y   | V   | T   | I   | D   | K   | E   | H   | G   | -   | K   | N   | L   | W   | Y   | Y   | F   | I   | E   | S   | E   | -   | -   | -   | -   | K   | N   | P   | S   | K   | D   | P   | V   | V   | L   | L |   |   |   |
| 21      | S   | A   | L   | I   | T   | N   | L   | P   | G   | F   | N   | G   | T   | F   | P   | S   | K   | H   | Y   | A   | G   | Y   | V   | A   | I   | D   | K   | H   | R   | N   | -   | K   | N   | L   | W   | Y   | Y   | F   | V   | E   | S   | E   | -   | -   | -   | -   | R   | N   | A   | S   | V   | D   | P   | V   | V   | L   | L |   |   |   |
| 22      | E   | D   | R   | I   | K   | A   | L   | P   | G   | Q   | P   | -   | K   | V   | G   | F   | S   | Q   | F   | S   | G   | Y   | V   | T   | V   | N   | E   | S   | H   | G   | -   | R   | S   | L   | F   | Y   | W   | L   | T   | E   | S   | S   | -   | -   | -   | -   | H   | S   | P   | H   | T   | K   | P   | L   | I   | L   | L |   |   |   |
| 23      | E   | D   | M   | I   | K   | A   | L   | P   | G   | Q   | P   | -   | Q   | V   | G   | F   | S   | Q   | F   | S   | G   | Y   | V   | T   | V   | N   | E   | S   | H   | G   | -   | R   | S   | L   | F   | Y   | W   | L   | T   | E   | S   | S   | -   | -   | -   | -   | S   | S   | S   | H   | T   | K   | P   | L   | I   | L   | L |   |   |   |
| 24      | K   | D   | R   | I   | K   | A   | L   | P   | G   | Q   | P   | -   | K   | V   | A   | F   | S   | Q   | F   | S   | G   | Y   | V   | N   | V   | N   | Q   | S   | H   | G   | -   | R   | A   | L   | F   | Y   | W   | L   | T   | E   | S   | S   | -   | -   | -   | -   | P   | S   | P   | H   | T   | K   | P   | L   | I   | L   | L |   |   |   |
| 25      | A   | D   | R   | I   | T   | S   | L   | P   | G   | Q   | P   | -   | N   | V   | T   | F   | E   | Q   | F   | S   | G   | Y   | V   | T   | V   | D   | K   | L   | S   | G   | -   | R   | S   | L   | F   | Y   | W   | L   | T   | E   | A   | S   | -   | -   | -   | -   | D   | L   | P   | L   | S   | K   | P   | L   | V   | I   | L | L |   |   |
| 26      | K   | D   | R   | I   | F   | H   | L   | P   | G   | E   | P   | N   | D   | V   | S   | F   | S   | H   | F   | S   | G   | Y   | I   | T   | V   | N   | E   | S   | A   | G   | -   | R   | A   | L   | F   | Y   | W   | L   | T   | E   | S   | P   | -   | -   | -   | -   | S   | -   | E   | N   | P   | E   | S   | K   | P   | L   | V | L | L |   |
| 27      | R   | D   | R   | I   | S   | N   | L   | P   | G   | Q   | P   | S   | N   | V   | D   | F   | R   | Q   | Y   | S   | G   | Y   | V   | T   | V   | H   | E   | E   | R   | G   | -   | R   | A   | L   | F   | Y   | W   | L   | V   | E   | S   | P   | L   | -   | -   | -   | -   | A   | -   | E   | D   | P   | K   | S   | R   | P   | L | V | L | L |
| 28      | K   | D   | K   | I   | S   | L   | P   | G   | Q   | P   | P   | N   | L   | N   | F   | S   | Q   | F   | S   | G   | Y   | V   | T   | V   | D   | P   | A   | A   | G   | -   | R   | A   | L   | F   | Y   | W   | L   | T   | E   | A   | P   | -   | -   | -   | -   | R   | P   | S   | G   | T   | K   | P   | L   | V   | L   | L   |   |   |   |   |
| 29      | Q   | D   | K   | V   | S   | K   | L   | P   | G   | Q   | N   | F   | N   | V   | S   | F   | A   | H   | Y   | S   | G   | F   | V   | A   | T   | N   | E   | Q   | L   | G   | -   | R   | A   | L   | F   | Y   | W   | L   | F   | E   | A   | V   | -   | -   | -   | -   | E   | D   | A   | K   | S   | K   | P   | L   | V   | L   | L |   |   |   |
| 30      | A   | D   | L   | V   | T   | N   | L   | P   | G   | Q   | P   | D   | -   | V   | S   | F   | F   | K   | H   | Y   | A   | G   | Y   | V   | P   | V   | D   | K   | S   | N   | G   | -   | R   | A   | L   | F   | Y   | W   | F   | F   | E   | A   | M   | -   | -   | -   | -   | D   | L   | P   | K   | E   | K   | P   | L   | V   | L | L |   |   |
| 31      | Q   | D   | L   | V   | T   | G   | L   | P   | G   | Q   | P   | D   | -   | V   | S   | F   | F   | R   | H   | Y   | A   | G   | Y   | V   | P   | V   | D   | E   | S   | N   | G   | -   | R   | A   | M   | F   | Y   | W   | F   | F   | E   | A   | M   | -   | -   | -   | -   | D   | L   | P   | K   | E   | K   | P   | L   | V   | L | L |   |   |
| 32      | L   | -   | -   | V   | T   | N   | F   | P   | G   | Q   | P   | K   | -   | V   | S   | F   | F   | R   | H   | Y   | A   | G   | Y   | V   | T   | V   | N   | I   | S   | G   | -   | R   | A   | L   | F   | Y   | W   | F   | F   | E   | A   | M   | -   | -   | -   | -   | T   | H   | P   | N   | V   | K   | P   | L   | V   | L   | L |   |   |   |
| 33      | -   | D   | K   | V   | N   | L   | P   | E   | Q   | P   | L   | N   | P   | K   | I   | S   | H   | F   | S   | G   | Y   | V   | N   | V   | N   | Q   | E   | N   | T   | -   | R   | S   | L   | F   | F   | W   | F   | F   | E   | A   | L   | S   | -   | -   | -   | -   | E   | S   | P   | S   | T   | R   | P   | L   | V   | L   | L |   |   |   |
| 34      | A   | D   | R   | V   | K   | E   | L   | P   | G   | Q   | P   | P   | -   | V   | K   | F   | R   | Q   | Y   | A   | G   | Y   | V   | T   | V   | N   | E   | T   | H   | G   | -   | R   | A   | L   | F   | Y   | W   | F   | F   | E   | A   | T   | -   | -   | -   | -   | Q   | N   | P   | S   | K   | K   | P   | V   | V   | L   | L | L |   |   |
| 35      | D   | D   | L   | V   | T   | G   | L   | P   | G   | Q   | P   | P   | -   | V   | N   | F   | K   | H   | Y   | A   | G   | Y   | V   | N   | L   | G   | P   | E   | Q   | K   | Q   | K   | A   | L   | F   | Y   | W   | F   | F   | E   | A   | Q   | -   | -   | -   | -   | Q   | N   | S   | S   | R   | R   | P   | L   | V   | L   | L |   |   |   |
| 36      | K   | D   | L   | I   | Q   | K   | L   | P   | G   | Q   | P   | S   | D   | V   | T   | F   | K   | Q   | Y   | G   | G   | Y   | V   | A   | V   | N   | K   | P   | A   | G   | -   | R   | F   | L   | Y   | Y   | Y   | F   | V   | E   | T   | I   | -   | -   | -   | -   | K   | P   | G   | N   | T   | T   | P   | L   | V   | I   | L | L |   |   |
| 37      | K   | D   | L   | I   | K   | K   | L   | P   | G   | Q   | P   | S   | G   | V   | S   | F   | R   | Q   | Y   | G   | G   | Y   | V   | P   | V   | N   | E   | P   | S   | -   | R   | F   | L   | Y   | Y   | Y   | F   | V   | E   | A   | I   | -   | -   | -   | -   | K   | P   | N   | T   | S   | T   | P   | L   | V   | I   | L   | L |   |   |   |
| 38      | K   | D   | L   | I   | E   | K   | L   | P   | G   | Q   | P   | S   | G   | I   | S   | F   | R   | Q   | Y   | G   | G   | Y   | V   | A   | V   | N   | E   | P   | A   | T   | -   | R   | F   | L   | Y   | Y   | Y   | F   | V   | E   | A   | I   | -   | -   | -   | -   | K   | P   | S   | K   | S   | T   | P   | L   | V   | L   | L |   |   |   |
| 39      | R   | D   | L   | I   | E   | N   | L   | P   | G   | Q   | P   | S   | -   | V   | S   | F   | R   | Q   | Y   | G   | G   | Y   | V   | T   | V   | N   | E   | S   | A   | G   | -   | R   | S   | L   | Y   | Y   | Y   | F   | V   | E   | A   | T   | -   | -   | -   | -   | K   | T   | K   | K   | S   | L   | P   | L   | V   | L   | L |   |   |   |

SCPL

| protein | 166 | 167 | 168 | 169 | 170 | 171 | 172 | 173 | 174 | 175 | 176 | 177 | 178 | 179 | 180 | 181 | 182 | 183 | 184 | 185 | 186 | 187 | 188 | 189 | 190 | 191 | 192 | 193 | 194 | 195 | 196 | 197 | 198 | 199 | 200 | 201 | 202 | 203 | 204 | 205 | 206 | 207 | 208 | 209 | 210 | 211 | 212 | 213 | 214 | 215 | 216 | 217 | 218 | 219 | 220 | 221 | 222 |
|---------|-----|-----|-----|-----|-----|-----|-----|-----|-----|-----|-----|-----|-----|-----|-----|-----|-----|-----|-----|-----|-----|-----|-----|-----|-----|-----|-----|-----|-----|-----|-----|-----|-----|-----|-----|-----|-----|-----|-----|-----|-----|-----|-----|-----|-----|-----|-----|-----|-----|-----|-----|-----|-----|-----|-----|-----|-----|
| 01      | W   | L   | T   | G   | G   | P   | G   | C   | S   | A   | I   | S   | -   | G   | L   | L   | F   | E   | N   | G   | P   | L   | T   | M   | K   | L   | D   | V   | Y   | N   | G   | T   | L   | P   | S   | L   | V   | S   | T   | T   | Y   | S   | W   | T   | K   | T   | S   | S   | I   | I   | F   | L   | D   | Q   | P   | V   | G   |
| 02      | W   | L   | T   | G   | G   | P   | G   | C   | S   | S   | I   | S   | -   | G   | L   | L   | F   | E   | N   | G   | P   | L   | T   | M   | K   | L   | D   | V   | Y   | N   | G   | T   | L   | P   | S   | L   | V   | S   | T   | T   | Y   | S   | W   | T   | K   | T   | S   | S   | M   | I   | F   | L   | D   | Q   | P   | V   | G   |
| 03      | W   | L   | S   | G   | G   | P   | G   | C   | S   | S   | I   | S   | -   | G   | L   | L   | F   | E   | N   | G   | P   | L   | A   | M   | K   | L   | D   | V   | Y   | N   | G   | T   | L   | P   | S   | L   | V   | S   | T   | T   | Y   | S   | W   | T   | K   | A   | S   | S   | M   | I   | F   | L   | D   | Q   | P   | V   | G   |
| 04      | W   | L   | T   | G   | G   | P   | G   | C   | S   | A   | I   | S   | -   | G   | L   | L   | Y   | Q   | N   | G   | P   | L   | A   | M   | K   | L   | D   | V   | Y   | N   | G   | T   | L   | P   | S   | L   | V   | S   | T   | T   | Y   | S   | W   | T   | K   | T   | S   | S   | M   | I   | F   | L   | D   | Q   | P   | V   | G   |
| 05      | W   | L   | T   | G   | G   | P   | G   | C   | S   | S   | I   | S   | -   | G   | L   | L   | F   | E   | N   | G   | P   | L   | A   | M   | K   | L   | D   | V   | Y   | N   | G   | T   | L   | P   | S   | L   | V   | P   | T   | T   | Y   | S   | W   | T   | K   | T   | S   | S   | M   | I   | F   | L   | D   | Q   | P   | V   | G   |
| 06      | W   | L   | T   | G   | G   | P   | G   | C   | S   | A   | I   | S   | -   | G   | L   | L   | Y   | E   | N   | G   | P   | L   | T   | M   | K   | L   | D   | V   | Y   | N   | G   | T   | L   | P   | S   | L   | V   | S   | T   | T   | Y   | S   | W   | T   | K   | N   | S   | S   | M   | I   | F   | L   | D   | Q   | P   | V   | G   |
| 07      | W   | L   | S   | G   | G   | P   | G   | C   | S   | S   | I   | S   | -   | G   | L   | L   | Y   | E   | N   | G   | P   | V   | N   | V   | K   | I   | E   | V   | Y   | N   | G   | T   | L   | P   | S   | L   | V   | S   | T   | T   | Y   | S   | W   | T   | K   | V   | S   | S   | I   | I   | Y   | L   | D   | Q   | P   | V   | G   |
| 08=SMT  | W   | L   | N   | G   | G   | P   | G   | C   | S   | C   | L   | G   | -   | G   | I   | I   | F   | E   | N   | G   | P   | V   | G   | L   | K   | F   | E   | V   | F   | N   | G   | S   | A   | P   | S   | L   | F   | S   | T   | T   | Y   | S   | W   | T   | K   | M   | A   | N   | I   | I   | F   | L   | D   | Q   | P   | V   | G   |
| 09      | W   | L   | N   | G   | G   | P   | G   | C   | S   | C   | L   | S   | -   | G   | L   | F   | F   | E   | N   | G   | P   | L   | A   | L   | K   | N   | K   | V   | Y   | N   | G   | S   | V   | P   | S   | L   | V   | S   | T   | T   | Y   | S   | W   | T   | K   | T   | A   | N   | I   | I   | F   | L   | D   | Q   | P   | V   | G   |
| 10      | W   | L   | D   | G   | G   | P   | G   | C   | S   | S   | L   | G   | -   | G   | L   | L   | F   | E   | N   | G   | P   | V   | A   | L   | K   | S   | A   | V   | Y   | N   | G   | S   | N   | P   | S   | L   | F   | S   | T   | T   | Y   | S   | W   | T   | K   | M   | A   | N   | I   | I   | Y   | L   | D   | Q   | P   | V   | G   |
| 11      | W   | L   | S   | G   | G   | P   | G   | C   | S   | S   | I   | T   | -   | G   | L   | L   | F   | Q   | N   | G   | P   | L   | A   | L   | K   | S   | E   | V   | Y   | N   | G   | S   | V   | P   | S   | L   | V   | S   | T   | T   | Y   | S   | W   | T   | K   | T   | A   | N   | I   | I   | F   | L   | D   | Q   | P   | V   | G   |
| 12      | W   | L   | S   | G   | G   | P   | G   | C   | S   | S   | I   | T   | -   | G   | L   | L   | F   | E   | N   | G   | P   | L   | A   | L   | K   | S   | K   | V   | Y   | N   | G   | S   | V   | P   | S   | L   | V   | S   | T   | T   | Y   | S   | W   | T   | K   | T   | A   | N   | I   | I   | F   | L   | D   | Q   | P   | V   | G   |
| 13      | W   | L   | S   | G   | G   | P   | G   | C   | S   | S   | L   | T   | -   | G   | L   | L   | F   | E   | N   | G   | P   | V   | A   | L   | K   | F   | E   | V   | Y   | N   | G   | S   | V   | P   | S   | L   | V   | S   | T   | T   | Y   | S   | W   | T   | K   | M   | A   | N   | I   | I   | F   | L   | D   | Q   | P   | V   | G   |
| 14      | W   | L   | S   | G   | G   | P   | G   | C   | S   | S   | F   | T   | -   | G   | L   | V   | Y   | E   | N   | G   | P   | L   | G   | F   | K   | V   | E   | A   | Y   | N   | G   | S   | I   | P   | T   | L   | V   | S   | T   | T   | Y   | S   | W   | T   | K   | V   | A   | N   | I   | I   | Y   | L   | D   | Q   | P   | V   | G   |
| 15      | W   | L   | T   | G   | G   | P   | G   | C   | S   | S   | F   | S   | -   | G   | L   | V   | Y   | E   | N   | G   | P   | L   | A   | F   | K   | V   | E   | T   | Y   | N   | G   | S   | V   | P   | T   | L   | V   | S   | T   | T   | Y   | S   | W   | T   | K   | V   | A   | N   | I   | I   | Y   | L   | D   | Q   | P   | V   | G   |
| 16      | W   | L   | S   | G   | G   | P   | G   | C   | S   | S   | F   | T   | -   | G   | L   | I   | Y   | E   | N   | G   | P   | L   | G   | F   | K   | V   | E   | A   | Y   | N   | G   | S   | I   | P   | T   | L   | V   | S   | T   | T   | Y   | S   | W   | T   | K   | V   | A   | N   | I   | I   | Y   | L   | D   | Q   | P   | V   | G   |
| 17      | W   | L   | S   | G   | G   | P   | G   | C   | S   | S   | F   | T   | -   | A   | L   | I   | Y   | E   | N   | G   | P   | I   | A   | F   | K   | A   | E   | Y   | N   | G   | S   | I   | P   | S   | L   | V   | S   | T   | T   | Y   | A   | W   | T   | K   | V   | A   | S   | I   | L   | Y   | L   | D   | Q   | P   | V   | G   |     |
| 18      | W   | L   | T   | G   | G   | P   | G   | C   | S   | T   | A   | L   | S   | -   | A   | L   | A   | F   | E   | I   | G   | P   | L   | A   | F   | K   | T   | E   | G   | Y   | N   | G   | G   | L   | P   | S   | L   | V   | S   | T   | S   | Y   | W   | T   | K   | V   | A   | S   | I   | I   | F   | L   | D   | Q   | P   | V   | G   |
| 19=SCT  | W   | L   | T   | G   | G   | P   | G   | C   | S   | S   | I   | C   | -   | G   | L   | L   | F   | A   | N   | G   | P   | L   | A   | F   | K   | G   | D   | E   | Y   | N   | G   | T   | V   | P   | P   | L   | E   | L   | T   | S   | F   | S   | W   | T   | K   | V   | A   | N   | I   | L   | Y   | L   | E   | A   | P   | A   | G   |
| 20      | W   | L   | N   | G   | G   | P   | G   | C   | S   | S   | M   | D   | -   | G   | F   | V   | Y   | E   | H   | G   | P   | F   | N   | F   | E   | L   | P   | K   | K   | N   | N   | S   | L   | P   | L   | L   | H   | L   | N   | P   | Y   | S   | W   | S   | K   | V   | S   | N   | I   | I   | Y   | L   | D   | S   | P   | V   | G   |
| 21      | W   | L   | N   | G   | G   | P   | G   | C   | S   | S   | M   | D   | -   | G   | F   | V   | Y   | E   | H   | G   | P   | F   | N   | F   | E   | P   | K   | K   | N   | S   | -   | -   | H   | L   | L   | H   | L   | N   | P   | Y   | S   | W   | S   | K   | V   | S   | N   | I   | I   | Y   | L   | D   | S   | P   | V   | G   |     |
| 22      | W   | L   | N   | G   | G   | P   | G   | C   | S   | S   | I   | A   | Y   | G   | A   | S   | E   | E   | I   | G   | P   | F   | R   | I   | S   | K   | T   | G   | C   | -   | -   | -   | -   | N   | L   | Y   | L   | N   | N   | F   | S   | W   | N   | T   | E   | A   | N   | L   | L   | F   | L   | E   | S   | P   | V   | G   |     |
| 23      | W   | L   | N   | G   | G   | P   | G   | C   | S   | S   | I   | A   | Y   | G   | A   | S   | E   | E   | I   | G   | P   | F   | R   | I   | N   | K   | T   | G   | S   | -   | -   | -   | -   | N   | L   | Y   | L   | N   | K   | F   | T   | W   | N   | T   | E   | A   | N   | L   | L   | F   | L   | E   | S   | P   | A   | G   |     |
| 24      | W   | L   | N   | G   | G   | P   | G   | C   | S   | S   | I   | A   | Y   | G   | A   | S   | E   | E   | I   | G   | P   | F   | R   | I   | N   | K   | N   | G   | S   | -   | -   | -   | -   | N   | L   | Y   | L   | N   | K   | F   | A   | W   | N   | K   | D   | A   | N   | L   | L   | F   | L   | E   | S   | P   | A   | G   |     |
| 25      | W   | L   | N   | G   | G   | P   | G   | C   | S   | S   | V   | A   | Y   | G   | A   | S   | E   | E   | I   | G   | P   | F   | R   | I   | S   | K   | G   | G   | S   | -   | -   | -   | -   | G   | L   | Y   | L   | N   | K   | F   | A   | W   | N   | S   | I   | S   | L   | L   | F   | L   | E   | S   | P   | A   | G   |     |     |
| 26      | W   | L   | N   | G   | G   | P   | G   | C   | S   | S   | V   | A   | Y   | G   | A   | A   | E   | E   | I   | G   | P   | F   | R   | I   | N   | P   | D   | G   | K   | -   | -   | -   | -   | T   | L   | Y   | H   | N   | P   | Y   | S   | W   | N   | K   | L   | A   | N   | L   | L   | F   | L   | E   | S   | P   | A   | G   |     |
| 27      | W   | L   | N   | G   | G   | P   | G   | C   | S   | S   | V   | A   | Y   | G   | A   | A   | E   | E   | I   | G   | P   | F   | R   | V   | G   | S   | D   | G   | K   | -   | -   | -   | -   | T   | L   | H   | S   | K   | L   | Y   | A   | W   | N   | K   | L   | A   | N   | L   | L   | F   | L   | E   | S   | P   | A   | G   |     |
| 28      | W   | L   | N   | G   | G   | P   | G   | C   | S   | S   | I   | A   | Y   | G   | A   | S   | E   | E   | I   | G   | P   | F   | R   | V   | N   | P   | D   | G   | K   | -   | -   | -   | -   | T   | L   | R   | L   | N   | L   | Y   | A   | W   | N   | K   | V   | A   | N   | V   | L   | F   | L   | D   | S   | P   | A   | G   |     |
| 29      | W   | L   | N   | G   | G   | P   | G   | C   | S   | S   | V   | A   | Y   | G   | E   | A   | E   | E   | I   | G   | P   | F   | H   | I   | K   | A   | D   | G   | K   | -   | -   | -   | -   | T   | L   | Y   | L   | N   | Q   | Y   | S   | W   | N   | Q   | A   | N   | I   | L   | F   | L   | D   | A   | P   | V   | G   |     |     |
| 30      | W   | L   | N   | G   | G   | P   | G   | C   | S   | S   | V   | G   | Y   | G   | A   | T   | Q   | E   | E   | I   | G   | P   | F   | L   | A   | D   | T   | N   | E   | K   | -   | -   | -   | -   | G   | L   | I   | F   | N   | P   | Y   | A   | W   | N   | K   | E   | V   | N   | M   | L   | F   | L   | E   | S   | P   | V   | G   |
| 31      | W   | L   | N   | G   | G   | P   | G   | C   | S   | S   | V   | G   | Y   | G   | A   | T   | Q   | E   | E   | I   | G   | P   | F   | L   | V   | D   | T   | N   | G   | N   | -   | -   | -   | -   | G   | L   | N   | F   | N   | P   | Y   | A   | W   | N   | K   | E   | A   | N   | M   | L   | F   | L   | E   | S   | P   | V   | G   |
| 32      | W   | L   | N   | G   | G   | P   | G   | C   | S   | S   | V   | G   | Y   | G   | A   | T   | Q   | E   | E   | I   | G   | P   | F   | L   | V   | D   | N   | K   | G   | N   | -   | -   | -   | -   | S   | L   | K   | F   | N   | P   | Y   | A   | W   | N   | K   | E   | A   | N   | I   | L   | F   | L   | E   | S   | P   | A   | G   |
| 33      | W   | L   | N   | G   | G   | P   | G   | C   | S   | S   | I   | G   | Y   | G   | A   | A   | S   | E   | L   | G   | P   | F   | R   | V   | V   | E   | N   | G   | T   | -   | -   | -   | -   | S   | L   | S   | F   | N   | Q   | Y   | S   | W   | V   | Q   | E   | A   | N   | M   | L   | F   | L   | E   | S   | P   | V   | G   |     |
| 34      | W   | L   | N   | G   | G   | P   | G   | C   | S   | S   | I   | G   | F   | G   | A   | A   | E   | E   | L   | G   | P   | F   | F   | P   | Q   | N   | S   | S   | Q   | P   | -   | -   | -   | -   | K   | L   | K   | L   | N   | P   | Y   | S   | W   | N   | K   | A   | A   | N   | L   | L   | F   | L   | E   | S   | P   | V   | G   |
| 35      | W   | L   | N   | G   | G   | P   | G   | C   | S   | S   | I   | A   | Y   | G   | A   | A   | Q   | E   | L   | G   | P   | F   | L   | V   | H   | D   | N   | G   | G   | -   | -   | -   | -   | K   | L   | T   | Y   | N   | H   | F   | S   | W   | N   | K   | E   | A   | N   | M   | L   | F   | L   | E   | A   | P   | V   | G   |     |
| 36      | W   | F   | N   | G   | G   | P   | G   | C   | S   | S   | L   | G   | -   | G   | A   | F   | K   | E   | L   | G   | P   | F   | R   | V   | H   | S   | D   | G   | K   | -   | -   | -   | -   | T   | L   | F   | R   | N   | P   | Y   | S   | W   | N   | N   | E   | A   | N   | V   | L   | F   | L   | E   | T   | P   | V   | T   |     |
| 37      | W   | F   | N   | G   | G   | P   | G   | C   | S   | S   | L   | G   | -   | G   | A   | F   | L   | E   | L   | G   | P   | F   | R   | V   | H   | S   | G   | R   | -   | -   | -   | -   | K   | L   | F   | R   | N   | P   | Y   | S   | W   | N   | N   | E   | A   | N   | V   | L   | F   | L   | E   | S   | P   | V   | T   |     |     |
| 38      | W   | F   | N   | G   | G   | P   | G   | C   | S   | S   | V   | G   | F   | G   | A   | F   | E   | E   | L   | G   | P   | F   | R   | V   | H   | S   | D   | G   | K   | -   | -   | -   | -   | T   | L   | Y   | R   | N   | P   | Y   | S   | W   | N   | N   | E   | A   | N   | M   | L   | F   | F   | E   | G   | P   | I   | S   |     |
| 39      | W   | L   | N   | G   | G   | P   | G   | C   | S   | S   | L   | Y   | -   | G   | A   | F   | Q   | E   | L   | G   | P   | F   | R   | I   | Y   | G   | D   | G   | K   | -   | -   | -   | -   | T   | L   | Y   | T   | N   | P   | Y   | S   | W   | N   | N   | V   | A   | N   | I   | L   | F   | L   | E   | S   | P   | V   | G   |     |
| 40      | W   | L   | N   | G   | G   | P   | G   | C   | S   | S   | L   | A   | Y   | G   | A   | L   | Q   | E   | L   | G   | P   | F   | R   | V   | H</ |     |     |     |     |     |     |     |     |     |     |     |     |     |     |     |     |     |     |     |     |     |     |     |     |     |     |     |     |     |     |     |     |

SCPL

| protein | 223 | 224 | 225 | 226 | 227 | 228 | 229 | 230 | 231 | 232 | 233 | 234 | 235 | 236 | 237 | 238 | 239 | 240 | 241 | 242 | 243 | 244 | 245 | 246 | 247 | 248 | 249 | 250 | 251 | 252 | 253 | 254 | 255 | 256 | 257 | 258 | 259 | 260 | 261 | 262 | 263 | 264 | 265 | 266 | 267 | 268 | 269 | 270 | 271 | 272 | 273 | 274 | 275 | 276 | 277 | 278 | 279 |   |   |   |
|---------|-----|-----|-----|-----|-----|-----|-----|-----|-----|-----|-----|-----|-----|-----|-----|-----|-----|-----|-----|-----|-----|-----|-----|-----|-----|-----|-----|-----|-----|-----|-----|-----|-----|-----|-----|-----|-----|-----|-----|-----|-----|-----|-----|-----|-----|-----|-----|-----|-----|-----|-----|-----|-----|-----|-----|-----|-----|---|---|---|
| 01      | T   | G   | F   | S   | Y   | S   | R   | T   | Q   | Q   | F   | N   | K   | P   | -   | -   | -   | -   | S   | D   | S   | G   | E   | A   | K   | R   | I   | H   | E   | F   | L   | Q   | K   | W   | L   | G   | K   | H   | Q   | V   | F   | S   | S   | N   | -   | -   | P   | F   | Y   | V   | A   | G   | D   | S   | Y   | S   | G   |   |   |   |
| 02      | T   | G   | F   | S   | Y   | S   | R   | T   | Q   | Q   | F   | N   | K   | P   | -   | -   | -   | -   | S   | D   | S   | G   | E   | A   | K   | R   | I   | H   | E   | F   | L   | Q   | K   | W   | L   | G   | K   | H   | Q   | E   | F   | S   | S   | N   | -   | -   | P   | F   | Y   | V   | A   | G   | D   | S   | Y   | S   | G   |   |   |   |
| 03      | A   | G   | F   | S   | Y   | S   | R   | T   | Q   | L   | F   | N   | K   | P   | -   | -   | -   | -   | S   | D   | S   | G   | E   | A   | K   | R   | I   | H   | E   | F   | L   | Q   | K   | W   | L   | G   | K   | H   | Q   | E   | F   | S   | S   | N   | -   | -   | P   | F   | Y   | V   | A   | G   | D   | S   | Y   | S   | G   |   |   |   |
| 04      | T   | G   | F   | S   | Y   | S   | R   | T   | Q   | L   | F   | N   | K   | P   | -   | -   | -   | -   | S   | D   | T   | G   | E   | A   | K   | R   | I   | H   | E   | F   | L   | Q   | K   | W   | L   | G   | K   | H   | Q   | E   | F   | S   | S   | N   | -   | -   | P   | F   | Y   | V   | A   | G   | D   | S   | Y   | S   | G   |   |   |   |
| 05      | T   | G   | F   | S   | Y   | S   | R   | T   | Q   | Q   | Y   | N   | K   | P   | -   | -   | -   | -   | S   | D   | T   | G   | E   | A   | K   | R   | I   | H   | E   | F   | L   | Q   | K   | W   | L   | G   | K   | H   | Q   | E   | F   | S   | S   | N   | -   | -   | P   | F   | Y   | V   | A   | G   | D   | S   | Y   | S   | G   |   |   |   |
| 06      | T   | G   | F   | S   | Y   | S   | R   | T   | E   | L   | F   | N   | K   | P   | -   | -   | -   | -   | S   | D   | T   | G   | E   | A   | K   | R   | I   | H   | E   | F   | L   | Q   | K   | W   | L   | G   | K   | H   | Q   | E   | F   | S   | S   | N   | -   | -   | P   | F   | Y   | V   | A   | G   | D   | S   | Y   | S   | G   |   |   |   |
| 07      | T   | G   | F   | S   | Y   | S   | R   | T   | K   | L   | V   | N   | K   | P   | -   | -   | -   | -   | S   | D   | S   | G   | E   | A   | K   | R   | I   | H   | E   | F   | L   | H   | K   | W   | L   | G   | K   | H   | Q   | E   | F   | S   | S   | N   | -   | -   | P   | F   | Y   | V   | A   | G   | D   | S   | Y   | S   | G   |   |   |   |
| 08=SMT  | S   | G   | F   | S   | Y   | S   | K   | T   | P   | I   | D   | K   | T   | -   | -   | -   | -   | -   | G   | D   | I   | S   | E   | V   | K   | R   | T   | H   | E   | F   | L   | Q   | K   | W   | L   | S   | R   | H   | P   | Q   | Y   | F   | S   | S   | N   | -   | -   | P   | L   | Y   | V   | V   | G   | D   | S   | Y   | S   | G |   |   |
| 09      | S   | G   | F   | S   | Y   | S   | K   | T   | P   | I   | E   | R   | T   | -   | -   | -   | -   | -   | S   | D   | T   | S   | E   | V   | K   | K   | I   | H   | E   | F   | L   | Q   | K   | W   | L   | I   | K   | H   | P   | Q   | F   | F   | L   | S   | N   | -   | -   | P   | F   | Y   | V   | V   | G   | D   | S   | Y   | S   | G |   |   |
| 10      | S   | G   | F   | S   | Y   | S   | R   | T   | P   | I   | G   | K   | S   | -   | -   | -   | -   | -   | S   | D   | T   | S   | E   | V   | K   | R   | I   | H   | E   | F   | L   | Q   | K   | W   | L   | S   | K   | H   | P   | Q   | F   | F   | S   | S   | N   | -   | -   | P   | F   | Y   | V   | V   | G   | D   | S   | Y   | S   | G |   |   |
| 11      | A   | G   | F   | S   | Y   | S   | R   | A   | P   | L   | I   | D   | T   | P   | -   | -   | -   | -   | T   | D   | T   | G   | E   | V   | K   | R   | I   | H   | E   | F   | L   | Q   | K   | W   | L   | S   | K   | H   | P   | Q   | F   | F   | S   | S   | N   | -   | -   | H   | F   | Y   | A   | G   | G   | D   | S   | Y   | S   | G |   |   |
| 12      | A   | G   | F   | S   | Y   | S   | R   | I   | P   | L   | I   | D   | T   | P   | -   | -   | -   | -   | S   | D   | T   | G   | E   | V   | K   | N   | I   | H   | E   | F   | L   | Q   | K   | W   | L   | S   | K   | H   | P   | Q   | F   | F   | S   | S   | N   | -   | -   | P   | F   | Y   | A   | S   | G   | D   | S   | Y   | S   | G |   |   |
| 13      | S   | G   | F   | S   | Y   | S   | R   | T   | P   | L   | V   | D   | K   | I   | -   | -   | -   | -   | S   | D   | T   | G   | E   | V   | K   | R   | I   | Y   | E   | F   | L   | Q   | K   | W   | L   | S   | K   | H   | Q   | Q   | F   | F   | S   | S   | N   | -   | -   | P   | F   | Y   | V   | T   | G   | D   | S   | Y   | S   | G |   |   |
| 14      | A   | G   | F   | S   | Y   | S   | R   | N   | P   | F   | A   | D   | R   | I   | P   | -   | -   | -   | -   | S   | D   | T   | G   | S   | A   | K   | L   | V   | N   | E   | F   | V   | R   | K   | W   | L   | A   | K   | H   | P   | E   | Y   | F   | S   | S   | N   | -   | -   | P   | F   | Y   | V   | T   | G   | D   | S   | Y   | S | G |   |
| 15      | T   | G   | F   | S   | Y   | S   | R   | N   | P   | F   | A   | D   | R   | I   | P   | -   | -   | -   | -   | S   | D   | T   | G   | S   | V   | K   | R   | V   | N   | E   | F   | V   | R   | K   | W   | L   | A   | K   | H   | P   | E   | Y   | F   | S   | S   | N   | -   | -   | P   | F   | Y   | V   | T   | G   | D   | S   | Y   | S | G |   |
| 16      | T   | G   | F   | S   | Y   | S   | R   | N   | P   | L   | A   | D   | I   | P   | -   | -   | -   | -   | -   | S   | D   | T   | G   | S   | A   | K   | R   | V   | D   | E   | F   | L   | R   | K   | W   | L   | T   | K   | H   | P   | E   | Y   | F   | S   | S   | N   | -   | -   | P   | F   | Y   | A   | G   | G   | D   | S   | Y   | S | G |   |
| 17      | T   | G   | F   | S   | Y   | S   | R   | N   | P   | L   | A   | D   | I   | P   | -   | -   | -   | -   | -   | S   | D   | T   | G   | V   | A   | K   | P   | V   | N   | E   | F   | L   | H   | K   | W   | L   | D   | K   | H   | P   | E   | F   | L   | S   | S   | N   | -   | -   | P   | L   | Y   | V   | A   | G   | D   | S   | Y   | S | G |   |
| 18      | T   | G   | Y   | S   | Y   | S   | T   | T   | P   | L   | S   | Y   | K   | P   | -   | -   | -   | -   | -   | S   | D   | T   | G   | E   | A   | K   | Q   | T   | Y   | E   | F   | L   | Q   | K   | W   | L   | V   | E   | N   | P   | Q   | F   | V   | S   | S   | N   | -   | -   | P   | I   | Y   | V   | A   | G   | D   | S   | Y   | S | G |   |
| 19=SCT  | S   | G   | Y   | S   | Y   | A   | K   | T   | R   | R   | A   | F   | E   | S   | -   | -   | -   | -   | -   | S   | D   | T   | K   | Q   | M   | H   | Q   | I   | D   | Q   | F   | L   | R   | S   | W   | F   | V   | K   | H   | P   | E   | F   | I   | S   | S   | N   | -   | -   | P   | F   | Y   | V   | G   | D   | S   | Y   | S   | G |   |   |
| 20      | V   | G   | F   | S   | Y   | S   | N   | N   | K   | S   | D   | Y   | I   | T   | -   | -   | -   | -   | -   | G   | D   | I   | K   | T   | A   | V   | D   | S   | H   | A   | F   | L   | L   | K   | W   | F   | Q   | M   | F   | P   | E   | F   | Q   | S   | S   | N   | -   | -   | P   | F   | F   | I   | S   | G   | E   | S   | Y   | A | G |   |
| 21      | V   | G   | F   | S   | Y   | S   | N   | D   | N   | A   | D   | Y   | T   | T   | -   | -   | -   | -   | -   | D   | D   | T   | K   | T   | A   | S   | D   | T   | H   | T   | F   | L   | L   | E   | W   | F   | K   | M   | F   | P   | E   | F   | Q   | S   | S   | N   | -   | -   | P   | F   | F   | I   | S   | G   | E   | S   | Y   | A | G |   |
| 22      | V   | G   | F   | S   | Y   | T   | N   | T   | S   | S   | D   | F   | E   | -   | -   | -   | -   | -   | E   | S   | G   | D   | E   | R   | T   | A   | Q   | E   | N   | L   | I   | F   | L   | I   | S   | W   | M   | S   | R   | F   | P   | Q   | Y   | R   | Y   | R   | -   | -   | D   | F   | Y   | I   | V   | G   | E   | S   | Y   | A | G |   |
| 23      | V   | G   | F   | S   | Y   | T   | N   | T   | S   | S   | D   | L   | K   | -   | -   | -   | -   | -   | D   | S   | G   | D   | E   | R   | T   | A   | Q   | D   | N   | L   | I   | F   | L   | I   | K   | W   | L   | S   | R   | F   | P   | Q   | Y   | Q   | Y   | R   | -   | -   | D   | F   | Y   | I   | V   | G   | E   | S   | Y   | A | G |   |
| 24      | V   | G   | Y   | S   | Y   | T   | N   | T   | S   | S   | D   | L   | K   | -   | -   | -   | -   | -   | D   | S   | G   | D   | E   | R   | T   | A   | Q   | D   | N   | L   | I   | F   | L   | I   | K   | W   | L   | S   | R   | F   | P   | Q   | Y   | K   | Y   | R   | -   | -   | D   | F   | Y   | I   | A   | G   | E   | S   | Y   | A | G |   |
| 25      | V   | G   | F   | S   | Y   | T   | N   | R   | S   | S   | D   | L   | F   | -   | -   | -   | -   | -   | N   | T   | G   | D   | R   | R   | T   | A   | K   | D   | S   | L   | Q   | F   | L   | I   | Q   | W   | L   | H   | R   | F   | P   | R   | Y   | N   | H   | R   | -   | -   | E   | I   | Y   | I   | T   | G   | E   | S   | Y   | A | G |   |
| 26      | V   | G   | F   | S   | Y   | S   | N   | T   | T   | S   | D   | L   | Y   | -   | -   | -   | -   | -   | T   | A   | G   | D   | Q   | R   | T   | A   | E   | D   | A   | Y   | V   | F   | L   | V   | K   | W   | F   | E   | R   | F   | P   | Q   | Y   | K   | H   | R   | -   | -   | E   | F   | Y   | I   | V   | G   | E   | S   | Y   | A | G |   |
| 27      | V   | G   | F   | S   | Y   | S   | N   | T   | T   | S   | D   | L   | Y   | -   | -   | -   | -   | -   | T   | T   | G   | D   | Q   | R   | T   | A   | E   | D   | A   | Y   | I   | F   | L   | V   | R   | W   | L   | E   | R   | F   | P   | E   | Y   | K   | E   | R   | -   | -   | A   | F   | Y   | I   | A   | G   | E   | S   | Y   | A | G |   |
| 28      | V   | G   | F   | S   | Y   | T   | N   | T   | S   | S   | D   | E   | L   | -   | -   | -   | -   | -   | T   | V   | G   | D   | K   | R   | T   | A   | E   | D   | A   | Y   | R   | F   | L   | V   | R   | W   | L   | E   | R   | F   | P   | E   | Y   | K   | E   | R   | -   | -   | A   | F   | Y   | I   | A   | G   | E   | S   | Y   | A | G |   |
| 29      | V   | G   | Y   | S   | Y   | S   | N   | T   | S   | S   | D   | L   | K   | -   | -   | -   | -   | -   | S   | N   | G   | D   | K   | R   | T   | A   | E   | D   | A   | S   | L   | K   | F   | L   | K   | W   | V   | E   | R   | F   | P   | E   | Y   | K   | G   | R   | -   | -   | D   | F   | Y   | I   | V   | G   | E   | S   | Y   | A | G |   |
| 30      | V   | G   | F   | S   | Y   | S   | N   | T   | S   | S   | D   | Y   | L   | -   | -   | -   | -   | -   | N   | L   | D   | H   | F   | A   | K   | K   | D   | A   | Y   | T   | F   | L   | C   | N   | W   | F   | E   | K   | F   | P   | E   | H   | K   | G   | N   | -   | -   | E   | F   | Y   | I   | A   | G   | E   | S   | Y   | A   | G |   |   |
| 31      | V   | G   | F   | S   | Y   | S   | N   | T   | S   | S   | D   | Y   | Q   | -   | -   | -   | -   | -   | K   | L   | G   | D   | D   | F   | T   | A   | R   | D   | A   | Y   | T   | F   | L   | C   | N   | W   | F   | E   | K   | F   | P   | E   | H   | K   | E   | N   | -   | -   | T   | F   | Y   | I   | A   | G   | E   | S   | Y   | A | G |   |
| 32      | V   | G   | F   | S   | Y   | S   | N   | T   | S   | S   | D   | Y   | R   | -   | -   | -   | -   | -   | K   | L   | G   | D   | D   | F   | T   | A   | R   | D   | S   | Y   | T   | F   | L   | Q   | K   | W   | F   | L   | R   | F   | P   | A   | Y   | K   | E   | K   | -   | -   | D   | F   | F   | I   | A   | G   | E   | S   | Y   | A | G |   |
| 33      | V   | G   | F   | S   | Y   | T   | N   | T   | S   | S   | D   | L   | E   | -   | -   | -   | -   | -   | N   | L   | N   | D   | A   | F   | V   | A   | E   | D   | A   | Y   | N   | F   | M   | V   | A   | W   | F   | A   | R   | Y   | P   | Q   | Y   | K   | S   | R   | -   | -   | D   | F   | F   | I   | A   | G   | E   | S   | Y   | A | G |   |
| 34      | V   | G   | F   | S   | Y   | T   | N   | T   | S   | R   | D   | I   | K   | -   | -   | -   | -   | -   | Q   | L   | G   | D   | T   | V   | T   | A   | R   | D   | S   | Y   | N   | F   | L   | V   | N   | W   | F   | K   | R   | F   | P   | Q   | Y   | K   | S   | H   | -   | -   | D   | F   | Y   | I   | A   | G   | E   | S   | Y   | A | G |   |
| 35      | V   | G   | F   | S   | Y   | T   | N   | N   | S   | M   | D   | L   | Q   | -   | -   | -   | -   | -   | K   | L   | G   | D   | E   | V   | T   | A   | S   | D   | S   | L   | A   | F   | L   | I   | N   | W   | F   | M   | K   | F   | P   | E   | F   | R   | S   | S   | -   | -   | E   | F   | Y   | I   | S   | G   | E   | S   | Y   | A | G |   |
| 36      | T   | G   | F   | S   | Y   | S   | N   | S   | P   | I   | N   | -   | -   | -   | -   | -   | -   | -   | G   | K   | Q   | G   | D   | K   | A   | T   | A   | E   | D   | N   | Y   | M   | F   | L   | V   | N   | W   | L   | E   | R   | F   | P   | E   | Y   | K   | G   | R   | -   | -   | D   | I   | Y   | I   | A   | G   | Q   | S   | Y | A | G |
| 37      | T   | G   | F   | S   | Y   | S   | N   | S   | P   | I   | D   | L   | E   | E   | L   | F   | G   | E   | K   | G   | D   | K   | A   | T   | A   | E   | D   | N   | Y   | M   | F   | L   | M   | N   | W   | L   | E   | R   | F   | P   | E   | Y   | K   | G   | R   | -   | -   | D   | V   | Y   | I   | A   | G   | Q   | S   | Y   | A   | G |   |   |
| 38      | V   | G   | F   | S   | Y   | S   | S   | T   | P   | F   | D   | W   | E   | I   | F   | G   | E   | Q   | A   | D   | K   | L   | T   | A   | E   | D   | N   | Y   | M   | F   | L   | V   | N   | W   | L   | E   | R   | F   | P   | E   | Y   | K   | G   | R   | -   | -   | D   | V   | Y   | I   | S   | G   | Q   | S   | Y   | A   | G   |   |   |   |
| 39      | T   | G   |     |     |     |     |     |     |     |     |     |     |     |     |     |     |     |     |     |     |     |     |     |     |     |     |     |     |     |     |     |     |     |     |     |     |     |     |     |     |     |     |     |     |     |     |     |     |     |     |     |     |     |     |     |     |     |   |   |   |

SCPL

| protein | 280 | 281 | 282 | 283 | 284 | 285 | 286 | 287 | 288 | 289 | 290 | 291 | 292 | 293 | 294 | 295 | 296 | 297 | 298 | 299 | 300 | 301 | 302 | 303 | 304 | 305 | 306 | 307 | 308 | 309 | 310 | 311 | 312 | 313 | 314 | 315 | 316 | 317 | 318 | 319 | 320 | 321 | 322 | 323 | 324 | 325 | 326 | 327 | 328 | 329 | 330 | 331 | 332 | 333 | 334 | 335 | 336 |   |   |   |
|---------|-----|-----|-----|-----|-----|-----|-----|-----|-----|-----|-----|-----|-----|-----|-----|-----|-----|-----|-----|-----|-----|-----|-----|-----|-----|-----|-----|-----|-----|-----|-----|-----|-----|-----|-----|-----|-----|-----|-----|-----|-----|-----|-----|-----|-----|-----|-----|-----|-----|-----|-----|-----|-----|-----|-----|-----|-----|---|---|---|
| 01      | L   | V   | V   | P   | A   | T   | V   | Q   | E   | I   | S   | K   | G   | N   | Y   | -   | -   | -   | -   | -   | -   | -   | -   | -   | -   | E   | C   | C   | N   | P   | P   | I   | N   | L   | Q   | G   | Y   | V   | L   | G   | N   | P   | L   | T   | D   | Y   | T   | T   | G   | S   | N   | S   | R   | I   | P   | F   | A   |   |   |   |
| 02      | L   | V   | V   | P   | A   | T   | V   | Q   | E   | I   | S   | K   | G   | N   | Y   | -   | -   | -   | -   | -   | -   | -   | -   | -   | -   | E   | C   | C   | N   | P   | P   | I   | N   | L   | Q   | G   | Y   | V   | L   | G   | N   | P   | L   | T   | D   | Y   | A   | I   | D   | Y   | N   | S   | R   | I   | P   | F   | A   |   |   |   |
| 03      | M   | V   | V   | P   | A   | T   | V   | Q   | E   | I   | S   | K   | G   | N   | Y   | -   | -   | -   | -   | -   | -   | -   | -   | -   | -   | E   | C   | C   | N   | P   | P   | I   | N   | L   | Q   | G   | Y   | V   | L   | G   | N   | P   | L   | T   | D   | F   | V   | Y   | D   | D   | Y   | N   | S   | R   | I   | P   | F   | A |   |   |
| 04      | L   | V   | V   | P   | A   | T   | V   | Q   | E   | I   | S   | K   | G   | N   | C   | -   | -   | -   | -   | -   | -   | -   | -   | -   | -   | Q   | C   | C   | N   | R   | P   | I   | N   | L   | Q   | G   | Y   | V   | L   | G   | N   | P   | L   | T   | D   | C   | V   | Y   | D   | C   | N   | Y   | R   | V   | P   | F   | A   |   |   |   |
| 05      | M   | V   | V   | P   | A   | T   | V   | Q   | E   | I   | S   | K   | G   | N   | Y   | -   | -   | -   | -   | -   | -   | -   | -   | -   | -   | Q   | C   | C   | S   | P   | P   | I   | N   | L   | Q   | G   | Y   | V   | L   | G   | N   | P   | L   | T   | E   | H   | A   | I   | D   | Y   | N   | Y   | R   | I   | P   | F   | A   |   |   |   |
| 06      | I   | T   | V   | P   | A   | T   | V   | Q   | E   | I   | S   | K   | G   | N   | Y   | -   | -   | -   | -   | -   | -   | -   | -   | -   | -   | Q   | C   | C   | K   | P   | P   | I   | N   | L   | Q   | G   | Y   | M   | L   | G   | N   | P   | I   | T   | D   | S   | K   | I   | D   | Y   | G   | N   | S   | Q   | I   | P   | F   | A |   |   |
| 07      | M   | V   | I   | P   | A   | L   | V   | Q   | E   | I   | S   | K   | G   | N   | Y   | -   | -   | -   | -   | -   | -   | -   | -   | -   | -   | -   | V   | C   | C   | K   | P   | P   | I   | N   | L   | Q   | G   | Y   | I   | L   | G   | N   | P   | S   | T   | E   | N   | E   | V   | D   | I   | N   | Y   | R   | I   | P   | Y   | A |   |   |
| 08=SMT  | M   | I   | V   | P   | A   | L   | V   | Q   | E   | I   | S   | Q   | G   | N   | Y   | -   | -   | -   | -   | -   | -   | -   | -   | -   | -   | I   | C   | C   | E   | P   | P   | I   | N   | L   | Q   | G   | Y   | M   | L   | G   | N   | P   | V   | T   | Y   | M   | D   | F   | E   | Q   | N   | F   | R   | I   | P   | Y   | A   |   |   |   |
| 09      | M   | I   | V   | P   | A   | L   | V   | H   | E   | I   | S   | K   | G   | N   | Y   | -   | -   | -   | -   | -   | -   | -   | -   | -   | -   | I   | C   | C   | N   | P   | P   | I   | N   | L   | Q   | G   | Y   | V   | L   | G   | N   | P   | I   | T   | H   | I   | E   | F   | E   | Q   | N   | F   | R   | I   | P   | Y   | A   |   |   |   |
| 10      | M   | I   | V   | P   | A   | L   | V   | Q   | E   | I   | S   | K   | G   | N   | Y   | -   | -   | -   | -   | -   | -   | -   | -   | -   | -   | I   | C   | C   | K   | H   | L   | I   | N   | L   | Q   | G   | Y   | V   | L   | G   | N   | P   | I   | T   | Y   | A   | E   | H   | E   | K   | N   | Y   | R   | I   | P   | F   | S   |   |   |   |
| 11      | M   | I   | V   | P   | A   | L   | V   | Q   | E   | I   | S   | K   | G   | N   | Y   | -   | -   | -   | -   | -   | -   | -   | -   | -   | -   | I   | C   | C   | N   | P   | P   | I   | N   | L   | K   | G   | Y   | V   | L   | G   | N   | P   | I   | T   | -   | H   | E   | D   | D   | P   | N   | Y   | R   | I   | P   | F   | S   |   |   |   |
| 12      | M   | I   | V   | P   | A   | L   | V   | Q   | E   | I   | S   | K   | G   | N   | Y   | -   | -   | -   | -   | -   | -   | -   | -   | -   | -   | I   | C   | C   | K   | P   | P   | I   | N   | L   | Q   | G   | Y   | I   | L   | G   | N   | P   | I   | T   | Y   | F   | E   | V   | D   | Q   | N   | Y   | R   | I   | P   | F   | S   |   |   |   |
| 13      | M   | I   | V   | P   | P   | L   | V   | Q   | E   | I   | G   | K   | G   | N   | Y   | -   | -   | -   | -   | -   | -   | -   | -   | -   | -   | -   | -   | -   | -   | Q   | I   | N   | L   | Q   | G   | Y   | I   | L   | G   | N   | P   | I   | T   | D   | T   | E   | S   | E   | Q   | N   | Y   | Q   | I   | P   | Y   | A   |     |   |   |   |
| 14      | K   | V   | I   | P   | A   | I   | V   | Q   | E   | I   | S   | N   | G   | N   | Y   | -   | -   | -   | -   | -   | -   | -   | -   | -   | -   | I   | C   | C   | K   | P   | Q   | I   | N   | L   | Q   | G   | Y   | V   | I   | G   | N   | P   | V   | A   | Y   | Y   | D   | H   | D   | K   | D   | S   | R   | I   | P   | F   | A   |   |   |   |
| 15      | K   | V   | I   | P   | A   | I   | V   | Q   | E   | I   | S   | N   | G   | N   | Y   | -   | -   | -   | -   | -   | -   | -   | -   | -   | -   | I   | C   | C   | K   | P   | Q   | I   | N   | L   | Q   | G   | Y   | V   | I   | G   | N   | P   | V   | A   | Y   | Y   | D   | H   | D   | K   | D   | S   | R   | I   | P   | F   | A   |   |   |   |
| 16      | K   | M   | V   | P   | V   | I   | V   | Q   | E   | I   | S   | N   | G   | N   | C   | -   | -   | -   | -   | -   | -   | -   | -   | -   | -   | I   | Y   | G   | K   | P   | Q   | I   | R   | L   | Q   | G   | Y   | V   | L   | G   | S   | P   | V   | T   | D   | Y   | D   | L   | D   | R   | N   | S   | R   | I   | Q   | F   | A   |   |   |   |
| 17      | I   | V   | I   | P   | A   | I   | V   | Q   | E   | I   | S   | N   | G   | N   | H   | -   | -   | -   | -   | -   | -   | -   | -   | -   | -   | L   | D   | S   | K   | P   | Q   | I   | N   | L   | Q   | G   | F   | V   | L   | G   | N   | P   | A   | T   | D   | T   | D   | I   | D   | L   | N   | S   | R   | I   | P   | F   | A   |   |   |   |
| 18      | I   | V   | I   | P   | A   | I   | V   | Q   | Q   | I   | S   | I   | G   | N   | E   | -   | -   | -   | -   | -   | -   | -   | -   | -   | -   | L   | H   | Y   | K   | P   | Q   | I   | N   | L   | K   | G   | Y   | I   | L   | G   | N   | P   | S   | T   | D   | L   | D   | S   | D   | H   | N   | S   | K   | I   | P   | Y   | A   |   |   |   |
| 19=SCT  | K   | I   | V   | P   | G   | A   | V   | Q   | Q   | I   | S   | L   | G   | N   | E   | -   | -   | -   | -   | -   | -   | -   | -   | -   | -   | K   | G   | L   | T   | P   | L   | I   | N   | I   | Q   | G   | Y   | V   | L   | G   | N   | P   | V   | T   | D   | K   | N   | I   | E   | T   | N   | Y   | R   | V   | P   | F   | A   |   |   |   |
| 20      | V   | Y   | V   | P   | T   | L   | A   | S   | E   | V   | V   | I   | G   | N   | K   | -   | -   | -   | -   | -   | -   | -   | -   | -   | -   | N   | G   | V   | K   | P   | A   | L   | N   | F   | K   | G   | Y   | L   | V   | G   | N   | V   | V   | A   | D   | P   | K   | F   | D   | G   | N   | A   | F   | V   | P   | F   | A   |   |   |   |
| 21      | I   | Y   | V   | P   | T   | L   | A   | A   | E   | V   | V   | K   | G   | N   | K   | N   | A   | M   | R   | T   | N   | K   | T   | S   | K   | N   | V   | T   | K   | P   | V   | I   | N   | F   | K   | G   | Y   | L   | V   | G   | N   | G   | V   | T   | D   | E   | V   | F   | D   | G   | N   | A   | L   | V   | P   | F   | T   |   |   |   |
| 22      | H   | Y   | V   | P   | Q   | L   | A   | Q   | K   | I   | H   | E   | Y   | N   | A   | Y   | -   | -   | -   | -   | -   | -   | -   | -   | -   | -   | K   | N   | -   | P   | V   | I   | N   | L   | K   | G   | F   | M   | V   | G   | N   | P   | E   | M   | D   | K   | N   | N   | D   | R   | L   | G   | T   | I   | T   | Y   | W   |   |   |   |
| 23      | H   | Y   | V   | P   | Q   | L   | A   | K   | K   | I   | H   | L   | Y   | N   | K   | A   | F   | -   | -   | -   | -   | -   | -   | -   | -   | -   | N   | N   | T   | P   | I   | N   | L   | K   | G   | F   | M   | V   | G   | N   | G   | D   | M   | D   | K   | H   | Y   | D   | R   | L   | G   | A   | A   | M   | Y   | A   |     |   |   |   |
| 24      | H   | Y   | V   | P   | Q   | L   | A   | K   | K   | I   | N   | D   | Y   | N   | K   | A   | F   | -   | -   | -   | -   | -   | -   | -   | -   | -   | S   | K   | -   | P   | I   | N   | L   | K   | G   | F   | L   | V   | G   | N   | A   | V   | T   | D   | N   | Q   | Y   | D   | S   | I   | G   | T   | V   | T   | Y   | W   |     |   |   |   |
| 25      | H   | Y   | V   | P   | Q   | L   | A   | K   | E   | I   | M   | N   | Y   | N   | K   | R   | S   | -   | -   | -   | -   | -   | -   | -   | -   | -   | K   | N   | -   | P   | L   | N   | L   | K   | G   | F   | I   | M   | V   | G   | N   | A   | V   | T   | D   | N   | H   | Y   | D   | N   | L   | G   | T   | V   | S   | Y   | W   |   |   |   |
| 26      | H   | Y   | V   | P   | Q   | L   | A   | S   | Q   | I   | V   | Y   | E   | K   | -   | -   | -   | -   | -   | -   | -   | -   | -   | -   | -   | -   | -   | R   | N   | P   | A   | I   | N   | L   | K   | G   | F   | I   | V   | G   | N   | A   | V   | I   | D   | D   | Y   | H   | D   | Y   | I   | G   | T   | F   | E   | Y   | W   |   |   |   |
| 27      | H   | F   | V   | P   | Q   | L   | S   | K   | L   | V   | H   | E   | R   | N   | -   | K   | G   | -   | -   | -   | -   | -   | -   | -   | -   | -   | F   | K   | N   | P   | A   | I   | N   | L   | K   | G   | F   | M   | V   | G   | N   | A   | V   | T   | D   | D   | Y   | H   | D   | Y   | I   | G   | T   | F   | E   | Y   | W   |   |   |   |
| 28      | H   | Y   | I   | P   | E   | L   | A   | Q   | L   | I   | V   | N   | R   | N   | -   | K   | G   | -   | -   | -   | -   | -   | -   | -   | -   | -   | A   | K   | N   | P   | T   | I   | N   | L   | K   | G   | I   | L   | M   | G   | N   | P   | L   | V   | D   | D   | Y   | N   | D   | N   | K   | G   | M   | R   | D   | Y   | W   |   |   |   |
| 29      | H   | Y   | I   | P   | Q   | L   | S   | E   | A   | I   | V   | K   | H   | N   | -   | Q   | G   | -   | -   | -   | -   | -   | -   | -   | -   | -   | S   | D   | K   | N   | S   | I   | N   | L   | K   | G   | Y   | M   | V   | G   | N   | G   | L   | M   | D   | D   | F   | H   | D   | R   | L   | G   | L   | F   | Q   | Y   | I   |   |   |   |
| 30      | I   | Y   | V   | P   | E   | L   | A   | E   | L   | V   | Y   | D   | N   | N   | N   | N   | N   | K   | -   | -   | -   | -   | -   | -   | -   | -   | N   | D   | L   | S   | L   | H   | I   | N   | L   | K   | G   | F   | L   | L   | G   | N   | P   | D   | I   | S   | N   | P   | H   | D   | D   | R   | W   | R   | G   | W   | V   | D | Y | A |
| 31      | K   | Y   | V   | P   | E   | L   | A   | E   | V   | V   | Y   | D   | N   | N   | N   | N   | N   | K   | -   | -   | -   | -   | -   | -   | -   | -   | N   | G   | S   | S   | F   | H   | I   | N   | L   | K   | G   | F   | L   | L   | G   | N   | P   | E   | T   | S   | D   | A   | E   | D   | W   | R   | G   | W   | V   | D   | Y   | A |   |   |
| 32      | K   | Y   | V   | P   | E   | L   | A   | E   | V   | I   | Y   | D   | K   | N   | K   | D   | N   | -   | -   | -   | -   | -   | -   | -   | -   | -   | E   | N   | L   | S   | L   | H   | I   | N   | L   | K   | G   | I   | L   | L   | G   | N   | P   | L   | T   | S   | Y   | A   | E   | D   | W   | T   | G   | W   | V   | D   | Y   | A |   |   |
| 33      | H   | Y   | S   | P   | Q   | L   | A   | E   | L   | I   | Y   | D   | R   | N   | K   | -   | -   | -   | -   | -   | -   | -   | -   | -   | -   | V   | Q   | P   | K   | D   | S   | F   | I   | N   | L   | K   | G   | F   | I   | V   | G   | N   | P   | L   | T   | D   | D   | E   | Y   | D   | N   | K   | G   | M   | I   | E   | Y   | A |   |   |
| 34      | H   | Y   | V   | P   | Q   | L   | A   | S   | E   | L   | I   | Y   | K   | E   | N   | K   | -   | -   | -   | -   | -   | -   | -   | -   | -   | -   | I   | A   | S   | K   | K   | D   | F   | I   | N   | L   | K   | G   | L   | M   | I   | G   | N   | A   | L   | L   | D   | D   | E   | T   | D   | Q   | K   | G   | M   | I   | E   | Y | A |   |
| 35      | H   | Y   | V   | P   | Q   | L   | A   | E   | V   | I   | Y   | D   | R   | N   | K   | K   | -   | -   | -   | -   | -   | -   | -   | -   | -   | -   | V   | T   | K   | D   | S   | S   | I   | N   | L   | K   | G   | F   | M   | I   | G   | N   | A   | V   | I   | N   | E   | A   | T   | D   | M   | A   | G   | L   | V   | D   | Y   | A |   |   |
| 36      | H   | Y   | V   | P   | Q   | L   | A   | Q   | I   | I   | L   | H   | R   | N   | -   | -   | -   | -   | -   | -   | -   | -   | -   | -   | -   | -   | -   | N   | Q   | T   | L   | I   | N   | L   | R   | G   | I   | L   | I   | G   | N   | P   | S   | L   | N   | R   | E   | I   | Q   | D   | D   | F   | G   | Y   | K   | F   | M   |   |   |   |
| 37      | H   | Y   | V   | P   | Q   | L   | A   | Q   | I   | I   | L   | H   | R   | N   | -   | -   | -   | -   | -   | -   | -   | -   | -   | -   | -   | -   | -   | K   | K   | T   | L   | V   | N   | L   | R   | G   | I   | L   | I   | G   | N   | P   | S   | L   | L   | T   | S   | I   | E   | D   | P   | Y   | G   | Y   | E   | F   | M   |   |   |   |
| 38      | H   | Y   | I   | P   | Q   | L   | A   | Q   | I   | I   | L   | H   | R   | N   | -   | -   | -   | -   | -   | -   | -   | -   | -   | -   | -   | -   | -   | N   | Q   | T   | F   | I   | N   | L   | R   | G   | I   | S   | I   | G   | N   | P   | G   | L   | D   | L   | L   | I   | E   | A   | D   | N   | E   | N   | K   | F   | I   |   |   |   |
| 39      | H   | Y   | V   | P   | Q   | L   | A   | Q   | T   | I   | L   | V   | H   | N   | K   | -   | -   | -   | -   | -   | -   | -   | -   | -   | -   | -   | -   | -   | N   | Q   | N   | F   | I   | N   | L   | R   | G   | I   | L   | I   | G   | N   | P   | T   | L   | N   | D   | I   | V   | E   | T   | T   | G   |     |     |     |     |   |   |   |

SCPL

| protein | 337 | 338 | 339 | 340 | 341 | 342 | 343 | 344 | 345 | 346 | 347 | 348 | 349 | 350 | 351 | 352 | 353 | 354 | 355 | 356 | 357 | 358 | 359 | 360 | 361 | 362 | 363 | 364 | 365 | 366 | 367 | 368 | 369 | 370 | 371 | 372 | 373 | 374 | 375 | 376 | 377 | 378 | 379 | 380 | 381 | 382 | 383 | 384 | 385 | 386 | 387 | 388 | 389 | 390 | 391 | 392 | 393 |   |
|---------|-----|-----|-----|-----|-----|-----|-----|-----|-----|-----|-----|-----|-----|-----|-----|-----|-----|-----|-----|-----|-----|-----|-----|-----|-----|-----|-----|-----|-----|-----|-----|-----|-----|-----|-----|-----|-----|-----|-----|-----|-----|-----|-----|-----|-----|-----|-----|-----|-----|-----|-----|-----|-----|-----|-----|-----|-----|---|
| 01      | H   | G   | M   | A   | L   | I   | S   | D   | E   | L   | Y   | E   | S   | L   | K   | K   | T   | C   | K   | G   | E   | Y   | T   | N   | -   | -   | V   | H   | P   | R   | N   | -   | -   | T   | Q   | C   | L   | K   | F   | V   | E   | E   | F   | N   | -   | K   | C   | T   | N   | R   | I   | F   | Q   | Q   | L   | I   | L   |   |
| 02      | H   | G   | M   | A   | L   | I   | S   | D   | E   | L   | Y   | E   | S   | L   | K   | K   | T   | C   | K   | G   | E   | Y   | T   | N   | -   | -   | V   | H   | P   | R   | N   | -   | -   | T   | Q   | C   | L   | K   | F   | I   | E   | E   | F   | N   | -   | K   | C   | T   | N   | R   | I   | C   | Q   | Q   | L   | I   | L   |   |
| 03      | H   | G   | M   | A   | L   | I   | S   | D   | E   | L   | F   | E   | S   | L   | K   | K   | T   | C   | K   | G   | D   | Y   | R   | N   | -   | -   | V   | H   | P   | R   | N   | -   | -   | T   | Q   | C   | L   | K   | F   | I   | E   | E   | F   | N   | -   | K   | C   | T   | N   | S   | I   | L   | Q   | Q   | R   | R   | I   | L |
| 04      | H   | K   | M   | A   | L   | I   | S   | D   | E   | L   | Y   | E   | S   | L   | K   | R   | T   | C   | R   | G   | E   | Y   | V   | N   | -   | -   | V   | H   | P   | H   | D   | -   | -   | T   | E   | C   | L   | K   | F   | V   | E   | E   | F   | N   | -   | K   | L   | T   | N   | R   | V   | C   | E   | R   | H   | I   | L   |   |
| 05      | H   | G   | M   | A   | L   | I   | S   | D   | E   | L   | Y   | E   | S   | L   | K   | R   | V   | C   | K   | G   | E   | Y   | -   | -   | -   | V   | D   | P   | R   | D   | -   | -   | T   | E   | C   | L   | K   | L   | V   | E   | E   | F   | S   | -   | K   | C   | T   | K   | G   | V   | C   | Q   | E   | V   | V   | I   |     |   |
| 06      | H   | G   | M   | A   | L   | I   | S   | D   | E   | L   | Y   | E   | S   | L   | K   | R   | I   | C   | K   | G   | E   | Y   | E   | H   | -   | -   | V   | D   | P   | Y   | N   | -   | -   | T   | E   | C   | L   | K   | L   | L   | E   | E   | F   | N   | -   | E   | C   | T   | S   | K   | L   | Y   | R   | S   | H   | I   | L   |   |
| 07      | H   | G   | M   | A   | L   | I   | S   | D   | E   | L   | Y   | E   | S   | M   | K   | R   | I   | C   | K   | G   | K   | E   | N   | -   | -   | V   | D   | P   | R   | N   | -   | -   | T   | K   | C   | L   | K   | L   | V   | G   | E   | Y   | Q   | -   | K   | C   | T   | K   | R   | I   | N   | K   | A   | L   | I   | L   |     |   |
| 08=SMT  | Y   | G   | M   | G   | L   | I   | S   | D   | E   | I   | Y   | E   | P   | M   | K   | R   | I   | C   | N   | G   | N   | Y   | Y   | N   | -   | -   | V   | D   | P   | S   | N   | -   | -   | T   | Q   | C   | L   | K   | L   | T   | E   | E   | Y   | H   | -   | K   | C   | T   | A   | K   | I   | N   | I   | H   | H   | I   | L   |   |
| 09      | H   | G   | M   | S   | L   | I   | S   | D   | E   | L   | Y   | E   | S   | L   | K   | R   | I   | C   | K   | G   | N   | Y   | F   | S   | -   | -   | V   | D   | P   | S   | N   | -   | -   | K   | K   | C   | L   | K   | L   | V   | E   | E   | Y   | H   | -   | K   | C   | T   | D   | N   | I   | N   | S   | H   | H   | T   | L   |   |
| 10      | H   | G   | M   | S   | L   | I   | S   | D   | E   | L   | Y   | E   | S   | L   | K   | R   | N   | C   | K   | G   | N   | Y   | E   | N   | -   | -   | V   | D   | P   | R   | N   | -   | -   | T   | K   | C   | V   | R   | L   | V   | E   | E   | Y   | H   | -   | K   | C   | T   | D   | K   | I   | N   | T   | Q   | H   | H   | I   | L |
| 11      | H   | G   | M   | A   | L   | I   | S   | D   | E   | L   | Y   | E   | S   | I   | R   | E   | A   | C   | K   | G   | N   | Y   | F   | N   | -   | -   | V   | D   | P   | R   | N   | -   | -   | T   | K   | C   | L   | K   | L   | V   | E   | E   | F   | H   | -   | K   | C   | T   | D   | K   | L   | N   | E   | F   | H   | I   | L   |   |
| 12      | H   | G   | M   | A   | L   | I   | S   | D   | E   | L   | Y   | E   | S   | I   | R   | R   | D   | C   | K   | G   | N   | Y   | F   | N   | -   | -   | V   | D   | P   | R   | N   | -   | -   | T   | K   | C   | L   | K   | L   | V   | E   | E   | Y   | H   | -   | K   | C   | T   | D   | E   | L   | N   | E   | F   | N   | I   | L   |   |
| 13      | H   | G   | M   | A   | L   | I   | S   | D   | E   | L   | Y   | K   | S   | M   | E   | R   | I   | C   | K   | G   | N   | Y   | V   | K   | -   | -   | V   | D   | S   | L   | N   | -   | -   | T   | K   | C   | Y   | K   | L   | I   | K   | D   | Y   | Q   | -   | K   | C   | I   | H   | K   | L   | N   | K   | Y   | H   | I   | L   |   |
| 14      | H   | G   | V   | A   | L   | I   | S   | D   | E   | L   | F   | E   | S   | L   | K   | R   | I   | C   | G   | G   | S   | Y   | S   | I   | -   | -   | V   | D   | P   | L   | N   | -   | -   | T   | E   | C   | L   | K   | L   | I   | K   | D   | Y   | H   | -   | K   | C   | V   | S   | G   | I   | Y   | Q   | E   | L   | I   | L   |   |
| 15      | H   | G   | V   | A   | L   | I   | S   | D   | E   | L   | F   | E   | S   | L   | K   | A   | S   | C   | G   | G   | S   | Y   | S   | V   | -   | -   | V   | D   | P   | L   | N   | -   | -   | T   | E   | C   | L   | K   | L   | I   | E   | D   | Y   | D   | -   | K   | C   | V   | S   | G   | I   | Y   | E   | E   | L   | I   | L   |   |
| 16      | H   | G   | M   | A   | L   | I   | S   | N   | E   | L   | Y   | E   | S   | M   | K   | R   | T   | C   | G   | G   | N   | Y   | I   | F   | -   | -   | V   | D   | P   | L   | N   | -   | -   | T   | E   | C   | L   | E   | L   | I   | K   | D   | Y   | D   | -   | N   | C   | V   | S   | G   | I   | Y   | E   | N   | L   | I   | L   |   |
| 17      | H   | G   | K   | A   | L   | I   | S   | D   | E   | H   | Y   | E   | S   | L   | K   | R   | T   | C   | Q   | G   | N   | Y   | I   | S   | -   | -   | V   | N   | P   | R   | N   | -   | -   | T   | K   | C   | L   | K   | L   | M   | E   | D   | F   | K   | -   | K   | C   | V   | S   | G   | I   | S   | E   | E   | Y   | I   | L   |   |
| 18      | H   | R   | M   | G   | L   | I   | S   | D   | E   | L   | Y   | E   | S   | L   | K   | R   | T   | C   | Q   | G   | N   | Y   | V   | K   | -   | -   | V   | D   | P   | T   | N   | -   | -   | T   | K   | C   | L   | K   | L   | M   | E   | D   | Y   | G   | -   | K   | C   | V   | S   | G   | I   | S   | E   | E   | L   | I   | L   |   |
| 19=SCT  | H   | G   | M   | G   | L   | I   | S   | D   | E   | L   | F   | E   | S   | L   | E   | R   | S   | C   | G   | G   | K   | F   | F   | N   | -   | -   | V   | D   | P   | S   | N   | -   | -   | A   | R   | C   | S   | N   | N   | L   | Q   | A   | Y   | D   | -   | H   | C   | M   | S   | E   | I   | Y   | S   | E   | H   | I   | L   |   |
| 20      | H   | G   | M   | G   | L   | I   | S   | D   | E   | L   | F   | E   | N   | V   | T   | K   | A   | C   | K   | G   | N   | F   | Y   | E   | -   | -   | I   | E   | G   | -   | -   | -   | L   | E   | C   | E   | E   | Q   | Y   | T   | K   | V   | N   | -   | D   | D   | T   | N   | Q   | L   | N   | I   | Y   | N   | I   | L   |     |   |
| 21      | H   | G   | M   | G   | L   | I   | S   | D   | E   | L   | Y   | E   | E   | T   | K   | L   | V   | C   | N   | G   | T   | Y   | Y   | T   | -   | -   | G   | G   | Q   | S   | G   | V   | S   | K   | E   | C   | A   | G   | K   | L   | K   | T   | V   | S   | -   | D   | T   | V   | N   | L   | L   | N   | Y   | N   | I   | L   |     |   |
| 22      | W   | S   | H   | A   | M   | I   | S   | D   | A   | S   | Y   | N   | R   | I   | L   | K   | N   | C   | D   | F   | T   | A   | D   | R   | -   | -   | -   | F   | S   | K   | -   | E   | C   | D   | S   | A   | I   | Y   | V   | A   | A   | -   | -   | A   | D   | F   | G   | D   | I   | D   | Q   | Y   | S   | I   | Y   |     |     |   |
| 23      | W   | S   | H   | A   | M   | I   | S   | D   | K   | T   | Y   | K   | S   | I   | L   | K   | H   | C   | S   | F   | T   | A   | D   | K   | -   | -   | -   | T   | S   | D   | -   | K   | C   | N   | W   | A   | L   | Y   | F   | A   | Y   | -   | -   | R   | E   | F   | G   | K   | V   | N   | G   | Y   | S   | I   | Y   |     |     |   |
| 24      | W   | T   | H   | A   | I   | I   | S   | D   | K   | S   | Y   | K   | S   | I   | L   | K   | Y   | C   | N   | F   | T   | V   | E   | R   | -   | -   | -   | V   | S   | D   | -   | D   | C   | D   | N   | A   | V   | N   | Y   | A   | M   | N   | -   | -   | H   | E   | F   | G   | D   | I   | D   | Q   | Y   | S   | I   | Y   |     |   |
| 25      | W   | S   | H   | A   | M   | I   | S   | D   | R   | T   | Y   | H   | Q   | L   | I   | S   | T   | C   | D   | F   | S   | R   | Q   | K   | -   | -   | -   | E   | S   | D   | -   | E   | C   | E   | T   | L   | Y   | S   | Y   | A   | M   | E   | -   | -   | Q   | E   | F   | G   | N   | I   | D   | Q   | Y   | S   | I   | Y   |     |   |
| 26      | W   | A   | H   | G   | L   | I   | S   | D   | L   | T   | Y   | H   | N   | L   | R   | I   | T   | C   | E   | F   | S   | S   | E   | -   | -   | -   | H   | P   | S   | -   | S   | K   | C   | K   | A   | M   | E   | A   | A   | D   | -   | -   | L   | E   | Q   | G   | N   | I   | D   | P   | Y   | S   | I   | Y   |     |     |     |   |
| 27      | W   | N   | H   | G   | L   | I   | S   | D   | S   | T   | Y   | H   | Q   | L   | K   | T   | A   | C   | Y   | S   | V   | S   | S   | Q   | -   | -   | -   | H   | P   | S   | -   | M   | Q   | C   | M   | V   | A   | L   | R   | N   | A   | E   | -   | -   | L   | E   | Q   | G   | N   | I   | D   | P   | Y   | S   | I   | F   |     |   |
| 28      | W   | N   | H   | G   | L   | I   | S   | D   | E   | S   | Y   | N   | D   | L   | T   | K   | W   | C   | L   | N   | D   | S   | I   | L   | -   | -   | -   | F   | P   | K   | -   | L   | N   | C   | N   | A   | A   | L   | N   | Q   | A   | L   | -   | -   | S   | E   | F   | G   | D   | I   | D   | P   | Y   | S   | I   | N   |     |   |
| 29      | W   | S   | L   | G   | F   | I   | S   | D   | Q   | T   | Y   | S   | L   | L   | Q   | L   | Q   | C   | G   | F   | E   | S   | F   | I   | -   | -   | -   | H   | S   | S   | -   | K   | Q   | C   | N   | K   | I   | A   | E   | I   | A   | D   | -   | -   | K   | E   | I   | G   | N   | I   | D   | Q   | Y   | S   | V   | F   |     |   |
| 30      | W   | S   | H   | A   | V   | I   | S   | D   | E   | T   | H   | R   | N   | I   | N   | R   | L   | C   | N   | F   | S   | S   | D   | D   | -   | -   | -   | V   | W   | N   | N   | D   | K   | C   | N   | E   | A   | I   | A   | E   | V   | D   | -   | -   | K   | Q   | Y   | N   | E   | I   | D   | I   | Y   | S   | L   | Y   |     |   |
| 31      | W   | S   | H   | A   | V   | I   | S   | D   | E   | T   | H   | R   | I   | I   | T   | R   | T   | C   | N   | F   | S   | S   | D   | N   | -   | -   | -   | T   | W   | S   | N   | D   | E   | C   | N   | E   | A   | V   | A   | E   | V   | L   | -   | -   | K   | Q   | Y   | H   | E   | I   | D   | I   | Y   | S   | I   | Y   |     |   |
| 32      | W   | N   | H   | A   | V   | V   | S   | D   | E   | T   | Y   | R   | V   | I   | K   | Q   | S   | C   | N   | F   | S   | S   | D   | T   | -   | -   | -   | T   | W   | D   | V   | K   | D   | C   | K   | E   | G   | V   | D   | E   | I   | L   | -   | -   | K   | Q   | Y   | K   | E   | I   | D   | Q   | F   | S   | L   | Y   |     |   |
| 33      | W   | S   | H   | A   | V   | I   | S   | D   | H   | L   | Y   | D   | S   | A   | K   | H   | N   | C   | D   | F   | K   | S   | S   | N   | -   | -   | -   | W   | S   | -   | -   | E   | P   | C   | N   | V   | A   | M   | N   | T   | V   | F   | -   | -   | T   | K   | Y   | K   | E   | I   | D   | I   | Y   | S   | I   | Y   |     |   |
| 34      | W   | D   | H   | A   | V   | I   | S   | D   | A   | L   | Y   | E   | K   | V   | N   | K   | N   | C   | D   | F   | K   | Q   | K   | L   | -   | -   | -   | V   | T   | -   | -   | K   | E   | C   | N   | D   | A   | L   | D   | E   | Y   | F   | -   | -   | D   | V   | Y   | K   | I   | L   | D   | M   | Y   | S   | L   | Y   |     |   |
| 35      | W   | S   | H   | A   | I   | I   | S   | D   | E   | V   | H   | T   | S   | I   | H   | G   | S   | C   | S   | F   | E   | E   | D   | T   | -   | -   | -   | T   | N   | K   | T   | E   | Q   | C   | Y   | N   | N   | F   | K   | G   | F   | M   | -   | -   | D   | A   | Y   | N   | D   | I   | D   | I   | Y   | S   | I   | Y   |     |   |
| 36      | F   | S   | H   | G   | L   | I   | S   | Q   | Q   | Q   | M   | D   | N   | Y   | N   | K   | F   | C   | T   | D   | S   | D   | L   | -   | -   | -   | -   | Y   | D   | W   | D   | K   | C   | H   | L   | A   | S   | Q   | K   | I   | E   | -   | -   | A   | Q   | K   | T   | H   | L   | D   | I   | Y   | N   | I   | Y   |     |     |   |
| 37      | L   | S   | H   | G   | L   | M   | V   | S   | Q   | Q   | Q   | M   | D   | N   | Y   | N   | Q   | F   | C   | L   | R   | D   | D   | L   | -   | -   | -   | Y   | D   | N   | D   | K   | C   | A   | L   | S   | V   | K   | T   | I   | D   | -   | -   | D   | A   | K   | K   | H   | L   | D   | T   | Y   | N   | I   | Y   |     |     |   |
| 38      | L   | S   | H   | G   | L   | V   | S   | Q   | Q   | K   | D   | F   | E   | E   | Y   | S   | K   | V   | C   | D   | F   | A   | N   | Y   | -   | -   | -   | -   | D   | M   | D   | E   | C   | P   | K   | I   | M   | P   | K   | F   | S   | I   | -   | -   | E   | H   | N   | K   | H   | L   | D   | V   | Y   | N   | I   | Y   |     |   |
| 39      | V   | S   | H   | A   | L   | L   | S   | Q   | D   | S   | L   | L   | S   | Y   | K   | E   | N   | C   | A   | T   | D   | T   | P   | -   | -   | -   | -   | K   | M   | E   | V   | D   | C   | I   | A   | L   | S   | M   | K   | I   | D   | -   | -   | D   | D   | I   | K   | K   | M   | N   | L   | Y   | N   | I   | L   |     |     |   |
| 40      | E   | S   | H   | A   | L   | I   | S   | E   | D   | S   | L   | A   | R   | L   | K   | S   | N   | C   | D   | L   | F   | K   | T   | E   | S   | A   | -   | -   | -   | S   | V   | M   | T   |     |     |     |     |     |     |     |     |     |     |     |     |     |     |     |     |     |     |     |     |     |     |     |     |   |





SCPL

| protein | 451 | 452 | 453 | 454 | 455 | 456 | 457 | 458 | 459 | 460 | 461 | 462 | 463 | 464 | 465 | 466 | 467 | 468 | 469 | 470 | 471 | 472 | 473 | 474 | 475 | 476 | 477 | 478 | 479 | 480 | 481 | 482 | 483 | 484 | 485 | 486 | 487 | 488 | 489 | 490 | 491 | 492 | 493 | 494 | 495 | 496 | 497 | 498 | 499 | 500 | 501 | 502 | 503 | 504 | 505 | 506 | 507 |   |   |   |   |   |
|---------|-----|-----|-----|-----|-----|-----|-----|-----|-----|-----|-----|-----|-----|-----|-----|-----|-----|-----|-----|-----|-----|-----|-----|-----|-----|-----|-----|-----|-----|-----|-----|-----|-----|-----|-----|-----|-----|-----|-----|-----|-----|-----|-----|-----|-----|-----|-----|-----|-----|-----|-----|-----|-----|-----|-----|-----|-----|---|---|---|---|---|
| 01      | -   | -   | -   | -   | -   | P   | D   | C   | Y   | I   | Y   | R   | Y   | L   | L   | T   | T   | Y   | W   | A   | N   | D   | A   | T   | V   | R   | E   | A   | L   | Q   | I   | N   | K   | E   | -   | S   | I   | G   | E   | W   | V   | R   | C   | Y   | Y   | S   | I   | -   | -   | -   | -   | P   | Y   | N   | N   | D   | I   |   |   |   |   |   |
| 02      | -   | -   | -   | -   | -   | P   | D   | C   | Y   | I   | Y   | R   | Y   | L   | L   | T   | T   | Y   | W   | A   | N   | D   | A   | T   | V   | R   | E   | A   | L   | Q   | I   | N   | K   | E   | -   | S   | I   | G   | E   | W   | V   | R   | C   | Y   | R   | T   | I   | -   | -   | -   | -   | P   | Y   | D   | N   | D   | I   |   |   |   |   |   |
| 03      | -   | -   | -   | -   | -   | P   | P   | N   | C   | Y   | I   | Y   | R   | F   | L   | L   | A   | A   | Y   | W   | A   | N   | D   | E   | T   | V   | R   | K   | A   | L   | Q   | I   | N   | K   | E   | -   | T   | I   | G   | E   | W   | V   | R   | C   | H   | Y   | G   | I   | -   | -   | -   | -   | P   | Y   | N   | Y   | D   | I |   |   |   |   |
| 04      | -   | -   | -   | -   | -   | P   | P   | S   | C   | Y   | I   | Y   | R   | F   | M   | L   | L   | T   | T   | Y   | W   | A   | N   | D   | E   | T   | V   | R   | K   | A   | L   | Q   | I   | N   | K   | E   | -   | S   | I   | G   | E   | W   | T   | R   | C   | Y   | R   | G   | I   | -   | -   | -   | -   | P   | Y   | N   | H   | D | I |   |   |   |
| 05      | -   | -   | -   | -   | -   | P   | P   | N   | C   | Y   | I   | Y   | R   | Y   | L   | L   | T   | T   | Y   | W   | V   | N   | D   | V   | N   | V   | R   | K   | A   | L   | Q   | I   | N   | K   | E   | -   | S   | I   | G   | E   | W   | V   | R   | C   | Y   | F   | G   | I   | -   | -   | -   | -   | P   | Y   | T   | H   | D   | I |   |   |   |   |
| 06      | -   | -   | -   | -   | -   | P   | D   | C   | Y   | I   | Y   | R   | Y   | L   | L   | S   | H   | Y   | W   | V   | N   | D   | E   | T   | V   | R   | K   | A   | L   | Q   | I   | N   | K   | E   | -   | S   | I   | R   | E   | W   | K   | R   | C   | D   | W   | S   | K   | -   | -   | -   | -   | P   | Y   | T   | K   | D   | I   |   |   |   |   |   |
| 07      | -   | -   | -   | -   | -   | P   | D   | C   | Y   | M   | Y   | R   | Y   | L   | L   | T   | T   | Y   | W   | A   | N   | D   | E   | N   | V   | Q   | R   | A   | L   | H   | V   | N   | K   | G   | -   | S   | I   | G   | E   | W   | V   | R   | C   | Y   | F   | E   | I   | -   | -   | -   | -   | P   | Y   | N   | K   | D   | I   |   |   |   |   |   |
| 08=SMT  | -   | -   | -   | -   | -   | V   | T   | S   | P   | D   | C   | Y   | Y   | P   | Y   | H   | L   | I   | E   | C   | W   | A   | N   | D   | E   | S   | V   | R   | E   | A   | L   | H   | I   | E   | K   | G   | -   | S   | K   | G   | K   | W   | A   | R   | C   | N   | R   | T   | I   | -   | -   | -   | -   | P   | Y   | N   | H   | D | I |   |   |   |
| 09      | -   | -   | -   | -   | -   | H   | I   | S   | P   | D   | C   | Y   | Y   | P   | Y   | H   | L   | I   | E   | C   | W   | A   | N   | N   | E   | S   | V   | R   | E   | A   | L   | H   | V   | D   | K   | G   | -   | S   | I   | G   | E   | W   | I   | R   | D   | H   | R   | G   | I   | -   | -   | -   | -   | P   | Y   | K   | S   | D | I |   |   |   |
| 10      | -   | -   | -   | -   | -   | I   | T   | S   | P   | D   | C   | Y   | Y   | L   | Y   | F   | L   | I   | E   | C   | W   | A   | N   | N   | E   | R   | S   | V   | R   | E   | A   | L   | H   | V   | T   | K   | G   | -   | T   | K   | G   | Q   | W   | Q   | R   | C   | N   | W   | T   | I   | -   | -   | -   | -   | P   | Y   | D   | N | D | I |   |   |
| 11      | -   | -   | -   | -   | -   | -   | -   | -   | P   | D   | C   | Y   | L   | Y   | P   | F   | Y   | L   | I   | S   | F   | W   | A   | N   | D   | E   | R   | S   | V   | R   | D   | A   | L   | H   | V   | N   | K   | R   | -   | S   | I   | G   | K   | W   | E   | R   | C   | N   | Y   | L   | S   | -   | K   | -   | -   | -   | P   | Y | N | K | D | I |
| 12      | -   | -   | -   | -   | -   | -   | -   | -   | P   | D   | C   | F   | L   | Y   | P   | Y   | L   | L   | G   | Y   | W   | I   | N   | D   | E   | S   | V   | R   | D   | A   | L   | H   | V   | N   | K   | S   | -   | S   | I   | G   | K   | W   | E   | R   | C   | T   | Y   | Q   | N   | R   | I   | -   | -   | -   | -   | P   | Y   | N | K | D | I |   |
| 13      | -   | -   | -   | -   | -   | -   | -   | -   | P   | D   | C   | F   | L   | Y   | R   | Y   | T   | L   | I   | T   | F   | W   | A   | N   | N   | K   | S   | V   | R   | E   | A   | L   | Q   | V   | N   | K   | G   | -   | S   | I   | G   | K   | W   | V   | Q   | C   | N   | Y   | K   | N   | -   | I   | -   | -   | -   | S   | Y   | N | Q | D | I |   |
| 14      | -   | -   | -   | -   | -   | -   | -   | -   | D   | D   | C   | Y   | T   | Y   | R   | Y   | L   | L   | S   | I   | Y   | W   | A   | N   | N   | E   | I   | V   | R   | R   | A   | L   | K   | V   | V   | E   | G   | -   | S   | K   | G   | K   | W   | E   | R   | C   | D   | L   | S   | V   | R   | -   | -   | -   | -   | S   | N   | Q | D | I |   |   |
| 15      | -   | -   | -   | -   | -   | -   | -   | -   | D   | D   | C   | Y   | T   | Y   | R   | Y   | L   | L   | S   | E   | Y   | W   | A   | N   | D   | N   | E   | T   | V   | R   | R   | A   | L   | K   | V   | V   | E   | G   | -   | S   | K   | G   | T   | W   | E   | R   | C   | D   | Y   | R   | V   | L   | -   | -   | -   | -   | S   | N | Q | D | I |   |
| 16      | -   | -   | -   | -   | -   | -   | -   | -   | D   | D   | C   | H   | S   | Y   | R   | S   | M   | L   | S   | D   | Y   | W   | A   | N   | N   | E   | S   | V   | R   | R   | A   | L   | K   | V   | V   | E   | G   | -   | T   | T   | G   | R   | W   | E   | R   | C   | K   | W   | T   | L   | Q   | -   | -   | -   | -   | N   | N   | K | D | I |   |   |
| 17      | -   | -   | -   | -   | -   | -   | -   | -   | S   | C   | M   | A   | N   | L   | H   | S   | S   | E   | Y   | W   | A   | N   | E   | K   | S   | V   | R   | K   | A   | L   | L   | V   | N   | E   | G   | -   | T   | V   | R   | K   | W   | I   | R   | C   | N   | T   | E   | I   | A   | -   | -   | -   | -   | Y   | N   | K   | D   | I |   |   |   |   |
| 18      | L   | S   | L   | P   | T   | P   | D   | C   | Y   | M   | Y   | R   | Y   | L   | L   | A   | S   | H   | W   | A   | N   | D   | E   | D   | V   | R   | R   | E   | L   | H   | V   | N   | K   | G   | -   | S   | I   | G   | K   | W   | M   | R   | C   | N   | W   | D   | L   | P   | -   | -   | -   | -   | Y   | E   | K   | D   | I   |   |   |   |   |   |
| 19=SCT  | S   | S   | L   | P   | P   | P   | S   | C   | F   | T   | Y   | R   | Y   | F   | L   | S   | A   | F   | W   | A   | N   | D   | E   | N   | V   | R   | R   | A   | L   | G   | V   | K   | K   | -   | -   | E   | V   | G   | K   | W   | N   | R   | C   | N   | S   | Q   | N   | -   | I   | -   | -   | -   | P   | Y   | T   | F   | E   | I |   |   |   |   |
| 20      | Q   | L   | L   | A   | D   | V   | T   | V   | P   | C   | I   | D   | D   | R   | V   | A   | T   | A   | W   | L   | N   | D   | P   | E   | I   | R   | K   | A   | I   | H   | T   | K   | E   | E   | S   | E   | I   | G   | R   | W   | E   | L   | C   | S   | G   | K   | L   | S   | -   | -   | -   | -   | F   | Y   | H   | D   | A   |   |   |   |   |   |
| 21      | Q   | L   | L   | A   | G   | F   | G   | V   | P   | C   | I   | D   | D   | T   | V   | A   | T   | K   | W   | L   | N   | D   | P   | A   | V   | R   | K   | A   | V   | H   | A   | K   | E   | E   | K   | A   | I   | G   | N   | W   | E   | L   | C   | S   | S   | N   | L   | E   | -   | -   | -   | -   | Y   | R   | H   | D   | T   |   |   |   |   |   |
| 22      | K   | R   | F   | L   | E   | D   | Q   | Y   | D   | P   | C   | T   | E   | N   | Y   | A   | E   | I   | Y   | Y   | N   | R   | P   | E   | V   | Q   | R   | A   | M   | H   | A   | N   | H   | T   | A   | I   | P   | Y   | K   | W   | T   | A   | C   | S   | D   | S   | V   | F   | N   | N   | W   | N   | W   | R   | D   | S   | D   |   |   |   |   |   |
| 23      | L   | L   | V   | E   | E   | Y   | Y   | D   | P   | C   | T   | E   | S   | Y   | A   | E   | I   | Y   | Y   | N   | R   | P   | D   | V   | Q   | R   | A   | M   | H   | A   | N   | L   | T   | S   | I   | P   | Y   | K   | W   | T   | L   | C   | N   | M   | V   | V   | N   | N   | -   | -   | N   | W   | K   | D   | S   | E   |     |   |   |   |   |   |
| 24      | R   | R   | R   | L   | V   | S   | G   | Y   | D   | P   | C   | T   | E   | S   | Y   | A   | E   | I   | Y   | Y   | N   | R   | P   | D   | V   | Q   | R   | A   | M   | H   | A   | N   | T   | T   | K   | I   | P   | Y   | K   | W   | T   | A   | C   | S   | E   | V   | L   | N   | R   | -   | -   | T   | W   | K   | D   | S   | D   |   |   |   |   |   |
| 25      | V   | L   | R   | K   | I   | S   | G   | Y   | D   | P   | C   | T   | E   | S   | Y   | A   | E   | I   | Y   | Y   | N   | R   | P   | D   | V   | Q   | K   | A   | L   | H   | A   | N   | T   | T   | K   | I   | P   | Y   | K   | W   | T   | A   | C   | S   | E   | V   | L   | N   | R   | -   | -   | N   | W   | D   | T   | D   |     |   |   |   |   |   |
| 26      | H   | P   | W   | M   | S   | R   | A   | Y   | D   | P   | C   | T   | E   | R   | Y   | S   | G   | M   | Y   | F   | N   | R   | P   | E   | V   | Q   | K   | A   | M   | H   | A   | N   | I   | T   | G   | L   | A   | Y   | P   | W   | K   | G   | C   | S   | D   | I   | V   | G   | S   | -   | -   | K   | W   | A   | D   | S   | P   |   |   |   |   |   |
| 27      | Y   | P   | W   | M   | S   | R   | A   | Y   | D   | P   | C   | T   | E   | R   | Y   | S   | N   | Y   | F   | N   | R   | L   | D   | V   | Q   | K   | A   | L   | H   | A   | N   | V   | T   | R   | L   | S   | Y   | P   | W   | K   | A   | C   | S   | D   | I   | V   | G   | S   | -   | -   | Y   | W   | D   | D   | S   | P   |     |   |   |   |   |   |
| 28      | Q   | A   | W   | R   | Y   | R   | G   | N   | D   | P   | C   | V   | V   | G   | Y   | T   | R   | K   | Y   | M   | N   | D   | P   | N   | V   | H   | K   | S   | F   | H   | A   | R   | L   | N   | -   | G   | S   | T   | P   | W   | T   | P   | C   | S   | R   | V   | I   | R   | K   | -   | -   | N   | W   | K   | D   | S   | P   |   |   |   |   |   |
| 29      | T   | S   | R   | V   | S   | E   | Q   | Y   | D   | P   | C   | L   | E   | K   | H   | T   | T   | V   | Y   | F   | N   | R   | L   | P   | E   | V   | Q   | K   | A   | L   | H   | V   | P   | P   | G   | L   | A   | P   | S   | K   | W   | D   | T   | C   | S   | D   | V   | S   | E   | -   | -   | H   | W   | N   | D   | S   | P   |   |   |   |   |   |
| 30      | P   | P   | R   | R   | L   | A   | G   | Y   | D   | P   | C   | L   | D   | D   | Y   | A   | R   | V   | F   | Y   | N   | R   | A   | D   | V   | Q   | K   | A   | L   | H   | A   | S   | D   | G   | V   | N   | L   | K   | N   | W   | S   | I   | C   | N   | M   | E   | I   | F   | H   | N   | W   | T   | Y   | V   | V   | Q   | -   |   |   |   |   |   |
| 31      | P   | P   | R   | L   | M   | G   | G   | Y   | D   | P   | C   | L   | D   | D   | Y   | A   | R   | V   | F   | Y   | N   | R   | A   | D   | V   | Q   | K   | A   | L   | H   | A   | S   | D   | G   | V   | N   | L   | K   | N   | W   | S   | I   | C   | N   | M   | E   | I   | F   | N   | N   | W   | T   | G   | S   | N   | P   | -   |   |   |   |   |   |
| 32      | I   | P   | R   | L   | F   | D   | G   | F   | D   | P   | C   | L   | D   | D   | Y   | A   | K   | V   | F   | Y   | N   | R   | A   | D   | V   | Q   | K   | A   | L   | H   | A   | T   | D   | G   | V   | H   | L   | K   | N   | W   | T   | I   | C   | N   | D   | D   | I   | L   | N   | H   | W   | N   | W   | T   | D   | S   | K   |   |   |   |   |   |
| 33      | R   | V   | R   | W   | F   | E   | G   | Y   | D   | P   | C   | Y   | S   | N   | Y   | A   | E   | E   | Y   | F   | N   | R   | V   | D   | V   | R   | L   | S   | L   | H   | A   | T   | T   | R   | N   | -   | V   | A   | R   | W   | K   | V   | C   | N   | D   | S   | I   | L   | Q   | T   | Y   | H   | F   | T   | V   | S   | -   |   |   |   |   |   |
| 34      | W   | R   | R   | M   | A   | A   | G   | Y   | D   | P   | C   | A   | S   | E   | Y   | T   | E   | K   | Y   | M   | N   | R   | K   | D   | V   | Q   | E   | A   | L   | H   | A   | N   | V   | T   | N   | I   | S   | Y   | P   | W   | T   | H   | C   | S   | D   | -   | T   | V   | S   | F   | W   | S   | D   | A   | P   | A   | -   |   |   |   |   |   |
| 35      | W   | D   | K   | F   | P   | A   | G   | Y   | D   | P   | C   | T   | E   | S   | Y   | A   | E   | N   | Y   | F   | N   | R   | K   | D   | V   | Q   | V   | A   | L   | H   | A   | N   | V   | T   | N   | L   | P   | Y   | P   | Y   | S   | P   | C   | S   | G   | -   | V   | I   | K   | R   | W   | S   | D   | A   | P   | S   | -   |   |   |   |   |   |
| 36      | K   | C   | T   | T   | I   | M   | K   | A   | D   | P   | C   | S   | G   | N   | Y   | L   | K   | A   | Y   | L   | N   | I   | K   | E   | V   | Q   | E   | A   | I   | H   | A   | N   | T   | T   | K   | I   | P   | Y   | E   | W   | T   | S   | C   | N   | T   | K   | L   | L   | W   | E   | W   | N   | E   | K   | D   | R   | Y   |   |   |   |   |   |
| 37      | K   | C   | T   | T   | V   | L   | E   | V   | D   | P   | C   | S   | K   | D   | Y   | L   | K   | A   | Y   | L   | N   | R   | K   | K   | V   | Q   | K   | A   | I   | H   | A   | N   | T   | T   | K   | L   | P   | Y   | E   | W   | T   | S   | C   | N   | N   | E   | L   | T   | E   | N   | W   | S   | E   | N   | D   | R   | D   |   |   |   |   |   |
| 38      | K   | C   | T   | T   | I   | M   | E   | V   | D   | P   | C   | R   | S   | N   | Y   | V   | K   | A   | Y   | L   | N   | S   | E   | N   | V   | Q   | E   | A   | M   | H   | A   | N   | T   | T   | K   | L   | P   | Y   | E   | W   | K   | A   | C   | N   | H   | Y   | L   | N   | S   | V   | W   | I   | D   | A   | D   | K   | D   |   |   |   |   |   |
| 39      | E   | C   | T   | T   | V   | L   | Q   | Y   | E   | P   | C   | G   | M   | Q   | Y   |     |     |     |     |     |     |     |     |     |     |     |     |     |     |     |     |     |     |     |     |     |     |     |     |     |     |     |     |     |     |     |     |     |     |     |     |     |     |     |     |     |     |   |   |   |   |   |

SCPL

| protein | 508 | 509 | 510 | 511 | 512 | 513 | 514 | 515 | 516 | 517 | 518 | 519 | 520 | 521 | 522 | 523 | 524 | 525 | 526 | 527 | 528 | 529 | 530 | 531 | 532 | 533 | 534 | 535 | 536 | 537 | 538 | 539 | 540 | 541 | 542 | 543 | 544 | 545 | 546 | 547 | 548 | 549 | 550 | 551 | 552 | 553 | 554 | 555 | 556 | 557 | 558 | 559 | 560 | 561 | 562 | 563 | 564 |   |
|---------|-----|-----|-----|-----|-----|-----|-----|-----|-----|-----|-----|-----|-----|-----|-----|-----|-----|-----|-----|-----|-----|-----|-----|-----|-----|-----|-----|-----|-----|-----|-----|-----|-----|-----|-----|-----|-----|-----|-----|-----|-----|-----|-----|-----|-----|-----|-----|-----|-----|-----|-----|-----|-----|-----|-----|-----|-----|---|
| 01      | K   | S   | S   | M   | P   | Y   | H   | V   | N   | N   | -   | S   | I   | S   | G   | Y   | R   | S   | L   | I   | Y   | S   | G   | D   | H   | D   | F   | E   | V   | P   | Y   | L   | G   | T   | Q   | A   | W   | I   | R   | S   | L   | N   | Y   | S   | I   | -   | -   | -   | -   | I   | D   | D   | W   | R   | P   | W   | M   |   |
| 02      | K   | S   | S   | M   | P   | Y   | H   | V   | N   | N   | -   | S   | I   | S   | G   | Y   | R   | S   | L   | I   | Y   | S   | G   | D   | H   | D   | L   | F   | E   | V   | P   | Y   | L   | G   | T   | Q   | A   | W   | I   | R   | S   | L   | N   | Y   | S   | I   | -   | -   | -   | -   | I   | D   | D   | W   | R   | P   | W   | M |
| 03      | K   | S   | S   | I   | P   | Y   | H   | M   | N   | N   | -   | S   | I   | N   | G   | Y   | R   | S   | L   | I   | Y   | S   | G   | D   | H   | D   | F   | L   | E   | V   | P   | F   | L   | G   | T   | Q   | A   | W   | I   | R   | S   | L   | N   | Y   | S   | V   | -   | -   | -   | -   | I   | D   | D   | W   | R   | P   | W   | M |
| 04      | K   | S   | S   | V   | P   | Y   | H   | M   | N   | N   | -   | S   | I   | D   | G   | Y   | R   | S   | L   | I   | Y   | S   | G   | D   | H   | D   | I   | Q   | V   | P   | F   | L   | G   | T   | Q   | A   | W   | I   | R   | S   | L   | N   | Y   | S   | I   | -   | -   | -   | -   | I   | D   | D   | W   | R   | P   | W   | M   |   |
| 05      | K   | S   | S   | V   | P   | Y   | H   | M   | N   | N   | -   | S   | I   | N   | G   | Y   | R   | S   | L   | I   | Y   | S   | G   | D   | H   | D   | L   | N   | V   | P   | F   | L   | A   | T   | Q   | A   | W   | V   | R   | S   | L   | N   | Y   | S   | I   | -   | -   | -   | -   | I   | D   | D   | W   | R   | P   | W   | M   |   |
| 06      | I   | S   | S   | V   | P   | Y   | H   | M   | N   | N   | -   | S   | I   | N   | G   | Y   | R   | S   | L   | I   | F   | S   | G   | D   | H   | D   | F   | E   | V   | P   | L   | I   | G   | T   | Q   | V   | W   | I   | K   | S   | L   | N   | Y   | A   | I   | -   | -   | -   | -   | V   | D   | D   | W   | R   | P   | W   | M   |   |
| 07      | K   | S   | S   | V   | P   | Y   | H   | M   | N   | N   | -   | S   | I   | D   | G   | Y   | A   | S   | L   | I   | F   | S   | G   | D   | H   | D   | M   | E   | V   | P   | Y   | L   | G   | T   | Q   | A   | W   | I   | R   | S   | L   | N   | Y   | S   | L   | -   | -   | -   | -   | I   | D   | D   | W   | R   | P   | W   | M   |   |
| 08=SMT  | V   | S   | S   | I   | P   | Y   | H   | M   | N   | N   | -   | S   | I   | S   | G   | Y   | R   | S   | L   | I   | Y   | S   | G   | D   | H   | D   | I   | A   | V   | P   | F   | L   | A   | T   | Q   | A   | W   | I   | R   | S   | L   | N   | Y   | S   | P   | -   | -   | -   | -   | I   | H   | N   | W   | R   | P   | W   | M   |   |
| 09      | R   | S   | S   | I   | P   | Y   | H   | M   | N   | N   | -   | S   | I   | N   | G   | Y   | R   | S   | L   | I   | F   | S   | G   | D   | H   | D   | I   | T   | M   | P   | F   | Q   | A   | T   | Q   | A   | W   | I   | K   | S   | L   | N   | Y   | S   | I   | -   | -   | -   | -   | I   | D   | D   | W   | R   | P   | W   | M   |   |
| 10      | I   | S   | S   | V   | P   | Y   | H   | M   | N   | N   | -   | S   | I   | N   | G   | Y   | R   | S   | L   | I   | Y   | S   | G   | D   | H   | D   | I   | T   | M   | P   | F   | Q   | A   | T   | Q   | A   | W   | I   | K   | S   | L   | N   | Y   | S   | I   | -   | -   | -   | -   | V   | D   | D   | W   | R   | P   | W   | M   |   |
| 11      | K   | S   | S   | V   | P   | Y   | H   | M   | N   | N   | -   | S   | V   | S   | G   | Y   | R   | S   | L   | I   | Y   | S   | G   | D   | H   | D   | L   | V   | V   | P   | F   | L   | A   | T   | Q   | A   | W   | I   | K   | S   | L   | N   | Y   | S   | I   | -   | -   | -   | -   | I   | D   | D   | W   | R   | P   | W   | M   |   |
| 12      | N   | N   | S   | I   | P   | Y   | H   | M   | N   | N   | -   | S   | I   | S   | G   | Y   | R   | S   | L   | I   | Y   | S   | G   | D   | H   | D   | L   | V   | V   | P   | F   | L   | A   | T   | Q   | A   | W   | I   | K   | S   | L   | N   | Y   | S   | I   | -   | -   | -   | -   | I   | H   | E   | W   | R   | P   | W   | M   |   |
| 13      | K   | S   | S   | V   | A   | Y   | H   | M   | K   | N   | -   | S   | I   | D   | G   | Y   | R   | S   | L   | I   | Y   | N   | G   | D   | H   | D   | M   | M   | V   | P   | F   | L   | A   | T   | Q   | A   | W   | I   | R   | S   | L   | N   | Y   | S   | I   | -   | -   | -   | -   | T   | D   | D   | W   | K   | P   | W   | M   |   |
| 14      | K   | S   | S   | I   | P   | F   | H   | M   | N   | N   | -   | S   | I   | K   | G   | Y   | R   | S   | L   | V   | I   | S   | G   | D   | H   | D   | M   | T   | I   | P   | F   | L   | G   | T   | Q   | A   | W   | I   | R   | S   | L   | N   | Y   | S   | I   | -   | -   | -   | -   | T   | E   | K   | W   | R   | P   | W   | M   |   |
| 15      | K   | S   | S   | I   | P   | F   | H   | M   | N   | N   | -   | S   | I   | R   | G   | Y   | R   | S   | L   | V   | I   | S   | G   | D   | H   | D   | M   | T   | I   | P   | F   | L   | G   | T   | Q   | A   | W   | I   | R   | S   | L   | N   | Y   | S   | I   | -   | -   | -   | -   | T   | E   | K   | W   | R   | P   | W   | M   |   |
| 16      | K   | S   | S   | I   | P   | Y   | H   | K   | K   | N   | -   | S   | I   | Q   | G   | Y   | R   | S   | L   | I   | F   | S   | G   | D   | H   | D   | M   | L   | T   | P   | Y   | V   | G   | T   | Q   | D   | W   | I   | R   | S   | L   | N   | Y   | S   | I   | -   | -   | -   | -   | I   | D   | K   | W   | R   | P   | W   | M   |   |
| 17      | R   | S   | S   | V   | P   | Y   | H   | K   | Y   | I   | -   | S   | I   | E   | G   | Y   | R   | S   | L   | V   | F   | S   | G   | D   | H   | D   | M   | L   | V   | P   | F   | L   | G   | T   | Q   | A   | W   | I   | R   | S   | L   | N   | Y   | S   | I   | -   | -   | -   | -   | V   | D   | D   | W   | R   | P   | W   | M   |   |
| 18      | K   | S   | S   | V   | P   | Y   | H   | K   | Y   | I   | -   | S   | I   | G   | D   | Y   | R   | S   | L   | V   | Y   | S   | S   | G   | D   | H   | D   | M   | M   | V   | P   | Y   | I   | G   | T   | E   | A   | W   | I   | K   | S   | L   | N   | Y   | S   | I   | -   | -   | -   | -   | T   | D   | D   | W   | R   | P   | W   | F |
| 19=SCT  | F   | N   | A   | V   | P   | Y   | H   | V   | N   | N   | -   | S   | L   | K   | G   | F   | R   | S   | L   | I   | Y   | S   | G   | D   | H   | D   | S   | M   | V   | P   | F   | S   | S   | T   | Q   | A   | W   | I   | R   | A   | L   | N   | Y   | S   | I   | -   | -   | -   | -   | V   | D   | D   | W   | R   | P   | W   | M   |   |
| 20      | G   | S   | M   | I   | D   | F   | H   | R   | N   | L   | -   | T   | L   | S   | G   | Y   | R   | A   | L   | I   | Y   | S   | G   | D   | H   | D   | M   | C   | V   | P   | F   | T   | G   | S   | E   | A   | W   | T   | K   | S   | L   | G   | Y   | K   | V   | -   | -   | -   | -   | I   | D   | E   | W   | R   | A   | W   | I   |   |
| 21      | G   | S   | M   | I   | E   | Y   | H   | R   | N   | L   | -   | T   | L   | S   | G   | F   | R   | A   | L   | I   | F   | S   | G   | D   | H   | D   | M   | C   | V   | P   | Y   | T   | G   | S   | E   | A   | W   | T   | K   | A   | M   | G   | Y   | K   | V   | -   | -   | -   | -   | V   | D   | E   | W   | R   | P   | W   | M   |   |
| 22      | N   | S   | M   | L   | P   | I   | Y   | K   | E   | L   | I   | A   | -   | A   | G   | L   | R   | I   | W   | V   | Y   | S   | G   | D   | T   | D   | S   | V   | I   | P   | V   | T   | A   | T   | R   | Y   | S   | L   | G   | K   | L   | N   | L   | R   | V   | -   | -   | -   | -   | K   | T   | R   | W   | Y   | P   | W   | Y   |   |
| 23      | F   | S   | M   | L   | P   | I   | Y   | K   | E   | L   | I   | A   | -   | A   | G   | L   | R   | I   | W   | V   | Y   | S   | G   | D   | T   | D   | S   | V   | I   | P   | V   | T   | A   | T   | R   | L   | A   | L   | S   | K   | L   | N   | L   | P   | V   | -   | -   | -   | -   | K   | T   | R   | W   | Y   | P   | W   | Y   |   |
| 24      | K   | T   | M   | L   | P   | I   | Y   | K   | E   | L   | I   | A   | -   | S   | G   | L   | R   | I   | W   | I   | F   | S   | G   | D   | T   | D   | S   | V   | V   | P   | V   | T   | A   | T   | R   | F   | S   | L   | S   | H   | L   | N   | L   | P   | V   | -   | -   | -   | -   | K   | T   | R   | W   | Y   | P   | W   | Y   |   |
| 25      | S   | T   | V   | L   | P   | I   | Y   | R   | E   | M   | I   | A   | -   | G   | G   | L   | R   | I   | W   | V   | F   | S   | G   | D   | V   | D   | S   | V   | V   | P   | V   | T   | A   | T   | R   | Y   | S   | L   | A   | R   | L   | S   | L   | S   | T   | -   | -   | -   | -   | K   | L   | P   | W   | Y   | P   | W   | Y   |   |
| 26      | L   | S   | M   | L   | P   | I   | Y   | K   | E   | L   | I   | A   | -   | A   | G   | L   | R   | I   | W   | V   | F   | S   | G   | D   | T   | D   | S   | V   | V   | P   | I   | T   | A   | T   | R   | Y   | S   | I   | R   | A   | L   | K   | L   | Q   | P   | -   | -   | -   | -   | L   | S   | K   | W   | Y   | P   | W   | N   |   |
| 27      | L   | S   | M   | L   | P   | I   | Y   | K   | E   | L   | I   | T   | -   | A   | G   | L   | K   | I   | W   | V   | F   | S   | G   | D   | T   | D   | A   | V   | V   | P   | I   | T   | A   | T   | R   | Y   | S   | V   | D   | A   | L   | K   | L   | A   | T   | -   | -   | -   | -   | I   | T   | N   | W   | Y   | P   | W   | Y   |   |
| 28      | K   | S   | M   | L   | P   | I   | I   | K   | N   | L   | L   | Q   | -   | A   | H   | L   | R   | I   | W   | I   | F   | S   | G   | D   | S   | D   | A   | V   | L   | P   | L   | S   | G   | T   | R   | H   | S   | I   | N   | A   | M   | K   | L   | K   | S   | -   | -   | -   | -   | S   | K   | R   | W   | Y   | P   | W   | Y   |   |
| 29      | S   | S   | V   | L   | N   | I   | Y   | H   | E   | L   | I   | A   | -   | A   | G   | L   | R   | I   | W   | V   | F   | S   | G   | D   | A   | D   | A   | V   | V   | P   | V   | T   | S   | T   | R   | Y   | S   | I   | D   | A   | L   | N   | L   | R   | P   | -   | -   | -   | -   | L   | S   | A   | Y   | G   | P   | W   | Y   |   |
| 30      | -   | S   | V   | L   | P   | I   | Y   | Q   | K   | L   | I   | A   | -   | G   | G   | L   | R   | I   | W   | V   | Y   | S   | G   | D   | T   | D   | G   | C   | I   | P   | V   | L   | G   | T   | R   | Y   | S   | L   | N   | A   | L   | G   | L   | P   | I   | -   | -   | -   | -   | K   | T   | A   | W   | R   | P   | W   | Y   |   |
| 31      | -   | S   | V   | L   | P   | I   | Y   | E   | K   | L   | I   | A   | -   | G   | G   | L   | R   | I   | W   | V   | Y   | S   | G   | D   | T   | D   | G   | R   | V   | P   | V   | L   | A   | T   | R   | Y   | S   | L   | N   | A   | L   | E   | L   | P   | I   | -   | -   | -   | -   | K   | T   | A   | W   | R   | P   | W   | Y   |   |
| 32      | R   | S   | V   | L   | P   | I   | Y   | K   | K   | L   | I   | A   | -   | G   | G   | F   | R   | V   | W   | V   | Y   | S   | G   | D   | T   | D   | G   | R   | V   | P   | V   | L   | S   | T   | R   | Y   | C   | I   | N   | K   | L   | E   | L   | P   | I   | -   | -   | -   | -   | K   | T   | A   | W   | R   | P   | W   | Y   |   |
| 33      | -   | S   | M   | L   | P   | T   | Y   | S   | K   | L   | I   | K   | -   | A   | G   | L   | K   | I   | W   | V   | Y   | S   | G   | D   | A   | D   | G   | R   | V   | P   | V   | I   | G   | S   | R   | Y   | C   | V   | E   | A   | L   | G   | I   | S   | V   | -   | -   | -   | -   | K   | S   | E   | W   | R   | S   | W   | F   |   |
| 34      | -   | S   | M   | L   | P   | T   | L   | R   | T   | L   | V   | S   | -   | A   | G   | L   | R   | V   | W   | V   | F   | S   | G   | D   | T   | D   | G   | R   | I   | P   | V   | T   | A   | T   | R   | Y   | S   | L   | K   | K   | L   | G   | L   | K   | I   | -   | -   | -   | -   | V   | Q   | D   | W   | T   | P   | W   | Y   |   |
| 35      | -   | T   | M   | I   | P   | I   | I   | Q   | K   | L   | L   | T   | -   | G   | G   | L   | R   | I   | W   | I   | Y   | S   | G   | D   | T   | D   | G   | R   | V   | P   | V   | T   | S   | T   | R   | Y   | S   | I   | K   | K   | M   | G   | L   | K   | V   | -   | -   | -   | -   | E   | S   | P   | W   | R   | S   | W   | F   |   |
| 36      | V   | S   | L   | T   | P   | I   | L   | Q   | E   | L   | M   | G   | -   | K   | G   | V   | R   | V   | M   | L   | Y   | N   | G   | D   | V   | D   | L   | V   | I   | P   | F   | T   | S   | T   | L   | A   | V   | V   | K   | T   | M   | N   | L   | T   | V   | -   | -   | -   | -   | V   | K   | E   | F   | R   | P   | W   | F   |   |
| 37      | T   | P   | M   | I   | P   | I   | L   | H   | E   | L   | M   | G   | -   | E   | G   | V   | R   | V   | M   | I   | Y   | N   | G   | D   | V   | D   | L   | E   | I   | P   | F   | A   | S   | T   | L   | A   | V   | V   | K   | E   | M   | N   | L   | T   | V   | -   | -   | -   | -   | V   | K   | E   | F   | R   | P   | W   | F   |   |
| 38      | A   | S   | M   | V   | P   | I   | L   | H   | D   | L   | M   | G   | -   | E   | G   | V   | R   | V   | L   | V   | Y   | S   | G   | D   | V   | D   | A   | A   | I   | P   | F   | A   | T   | M   | A   | V   | L   | K   | T   | M   | N   | L   | T   | V   | -   | -   | -   | -   | V   | K   | E   | W   | R   | P   | W   | F   |     |   |
| 39      | A   | S   | M   | L   | P   | I   | L   | K   | E   | L   | M   | K   | H   | D   | Q   | L   | R   | V   | W   | V   | Y   | T   | G   | D   | T   | D   | T   | V   | I   | P   | L   | T   | V   | T   | M   | H   | A   | L   | K   | M   | M   | N   | L   | T   | A   | -   | -   | -   | -   | V   |     |     |     |     |     |     |     |   |
