# Supplementary material
Source: PubMed Central journal article supplement (PMC1150427)
Supplement: plntphys_pp.104.057950_3.pdf [file plntphys_pp.104.057950_3.pdf]

**Table 1, Supplemental**

Primer sequences used for RT-PCR expression analysis of SCPL genes.

| <u>SCPL<br/>Protein</u> | <u>Gene<br/>accession<br/>number</u> | <u>Forward primer</u> | <u>Reverse primer</u>    |
|-------------------------|--------------------------------------|-----------------------|--------------------------|
| 1                       | At5g36180                            | GGTACGATGTTATTACAG    | TTATACGTAAAGGCAGGTCC     |
| 2                       | At1g73300                            | GGTACGATGTTATCGCAC    | TTATACGTAAAGGCAGGTA      |
| 3                       | At1g73280                            | CATATGTCAACGACGTATAA  | TTTATACGTAAAGGACGT       |
| 4                       | At1g73310                            | TGCGAACGACATATATTAC   | GAATCACACACAATCTCTT      |
| 5                       | At1g73290                            | GCCAAGAAGTTGTAATAAAA  | CTAGATCCATAAACTCTAA      |
| 6                       | At1g73270                            | TACAGATCACATATTATAC   | CCAACAATTGTCCCTTGT       |
| 7                       | At3g10450                            | AACAAAGCACTTATAATAACG | AAATGTGGAATTGCTTTGG      |
| 8                       | At2g22990                            | GATGTAACCAATGTAACA    | GGTGAAGGTCATAAGCCTT      |
| 9                       | At2g23010                            | GACTCAAATACACAACACA   | CGTAAAAGACTAAAACACGA     |
| 10                      | At2g23000                            | AAAAAAGGACATGGAATAAC  | CTCTAAAAGAGGCCTTCTA      |
| 11                      | At2g22970                            | ATTAGCTTTTGGGCCAAT    | CTCCTCAGGAACAAATAGC      |
| 12                      | At2g22920                            | CTTGGCTACTGGATCAAC    | TCAATAATATAAACAAAAA      |
| 13                      | At2g22980                            | TTCATAAACTGAATAAGTAT  | TTTTATGTTACATAGTTTT      |
| 14                      | At3g12230                            | AAACCAAATGTGAGACT     | TGGTTTATATTCCAACGTA      |
| 15                      | At3g12240                            | AAATCAAATGCGAGCAC     | TGGTTTATATTCCAATGTG      |
| 16                      | At3g12220                            | CGTACCAAATGTGACCTT    | CAC TTGAGGAGTAAGTTTT     |
| 17                      | At3g12203                            | GCATGTGGCTTTATCTTG    | TAGTCATCAACATAGATTG      |
| 18                      | At1g33540                            | TCCTTATTCAGGAGAACAC   | TTTCAATGATTTTTGTTGG      |
| 19                      | At5g09640                            | GAGCTCTAGGCGTGAAAAAG  | ACAACAAAGAGAGAAAGAG      |
| 20                      | At4g12910                            | CATTAGATCGCTTCCCTTCA  | AACTGATGAGACAGCTCTC      |
| 21                      | At3g25420                            | TATCGAGTTTCTGCCTAAG   | TGCATGGAAC TTGAGAATT     |
| 22                      | At2g24000                            | CGATTCCGCCATTTATGTC   | AGTGGAGCTACAAATGTTG      |
| 23                      | At2g24010                            | CAATTGGGCACCTACTTTC   | GTTAACTCGGGTTTTGGAG      |
| 24                      | At4g30610                            | CGACAATGCGGTTAACTAC   | GTTTAGGTTATTTAAAGTAG     |
| 25                      | At3g02110                            | CGAAACCCTTTATCTTAC    | CAATCTCTCTCTTGACTTC      |
| 26                      | At2g35780                            | CACCAAGGCCATGGAAGCT   | ACTCTGGTCTTATCACAGT      |
| 27                      | At3g07990                            | TATGGTGGCTCTGAGAAAT   | GTCCATTCAAGGTTTTATC      |
| 28                      | At2g35770                            | CAACGCTGCTCTGAACCAA   | ATGTACCTCATGCAAATAA      |
| 29                      | At4g30810                            | TAACAAGATTCTGGAGATA   | AAGTTTTTGATTGAGAATC      |
| 30                      | At4g15100                            | CATAGCAGAAGTTGACAAG   | ACTCAAATATTAGATTACC      |
| 31                      | At1g11080                            | CAGCGTAATACTTGGAGC    | TAATCATTGAATTTCTCT       |
| 32                      | At1g61130                            | TAGTGACACTACATGGGAC   | GATCTGGTGGATTATTTCC      |
| 33                      | At3g17180                            | GTCTTCGAACTGGTCAGAG   | CGGTA AAAAGATAGAGAGA     |
| 34                      | At5g23210                            | ACAAAACTTGTGACCAAG    | TCATAAAATCTGTGGGTAG      |
| 35                      | At5g08260                            | TTTCAAAGGGTTCATGGAT   | AACTTGCCATCATGACTTG      |
| 36                      | At3g52000                            | TGCCATTTGGCGTCCCAAA   | GTCCATTAAAGTTTATAGG      |
| 37                      | At3g52010                            | TGCGCACTTTGCGTAAAAA   | ATATTGTTCAAGTCAATCGA     |
| 38                      | At2g05850                            | TGCCCAAAGATAATGCCTA   | ATCTTGATCAGTCAATAGA      |
| 39                      | At3g52020                            | TGCATCGCATTGAGTATGA   | GAAAAAGAGTGTTGTGGT       |
| 40                      | At3g63470                            | TGCGCGGTGGTGTCCGACC   | AAAAGCTAATTAAGAGAGA      |
| 41                      | At5g42230                            | GCTATCCGTGAAGCCGGAG   | TACTCTAATAATGAGATTC      |
| 42                      | At5g42240                            | GCTATTAGTGAAACTGAAA   | TTAAATACAAAAACTACAT      |
| 43                      | At2g12480                            | TGTATATATGCAATCGTTG   | AATATGTTTCTATCTCAAC      |
| 44                      | At1g43780                            | TGCGAAGCTGCAGTGAATC   | GAAAAATGACCAACGAAGA      |
| 45                      | At1g28110                            | GAGTGAGTACTATAGAGGG   | TATTATTTTATACTTACAT      |
| 46                      | At2g33530                            | GAAACAAGTAGATTCATAG   | CTCAGAAAATGGTAAACGC      |
| 47                      | At5g22980                            | GTCTTGGTGGTGGTTAGT    | TTTTTAAATCAAATGTTCT      |
| 48                      | At3g45010                            | GTGTGCTTCTTACTACT     | GCCGGTTCGGAATTTGGAT      |
| 49                      | At3g10410                            | GAAGTGTGGCACAACCTTC   | CAACGCAAAAAGAAGATGTG     |
| 50                      | At1g15000                            | GACAGGACTCGCGACGCTC   | AAGTACAAGTACACAATAT      |
| 51                      | At2g27920                            | GGAAGAGAAAAATAAAAAAG  | GTTTGGAAAGAAAGATGGG      |
| -                       | ACT2/8                               | CATCATGGTGTCTGTTGG    | CATGAGGTAATCAGTAAGGTCAGG |
